# Supplementary material
Source: PubMed Central journal article supplement (PMC3528799)

**Supporting Information**  
*Organic Letters*

“Substituted Imidazo[1,2-a]pyridines as  $\beta$ -Strand Peptidomimetics”

Chang Won Kang, Yongmao Sun, and Juan R. Del Valle\*  
*Drug Discovery Department, H. Lee Moffitt Cancer Center and Research Institute*

**CONTENTS (34 pages)**

- Experimental Procedures S2 – S11
- 1D ( $^1\text{H}$  and  $^{13}\text{C}$ ) NMR Spectra S12 – S25
- 2D NMR Spectra S26 – S30
- $\delta\Delta/\delta T$  Experiments S31 – S32
- Concentration Dependence Experiments S33 – S34

## EXPERIMENTAL PROCEDURES

**General Techniques.** Unless stated otherwise, reactions were performed in flame-dried glassware under a positive pressure of argon or nitrogen gas using dry solvents. Commercial grade reagents and solvents were used without further purification except where noted. Diethyl ether, toluene, dimethylformamide dichloromethane, and tetrahydrofuran were purified by a Glass Contour column-based solvent purification system. Other anhydrous solvents were purchased directly from chemical suppliers. Thin-layer chromatography (TLC) was performed using silica gel 60 F254 pre-coated plates (0.25 mm). Flash chromatography was performed using silica gel (60  $\mu\text{m}$  particle size). The purity of all compounds was judged by TLC analysis (single spot/two solvent systems) using a UV lamp, CAM (ceric ammonium molybdate), ninhydrin, or basic  $\text{KMnO}_4$  stain(s) for detection purposes. 1D and 2D NMR spectra were recorded on a 400 or 500 MHz spectrometer. Proton chemical shifts are reported as  $\delta$  values relative to residual signals from deuterated solvents ( $\text{CDCl}_3$  or  $\text{DMSO}-d_6$ ).

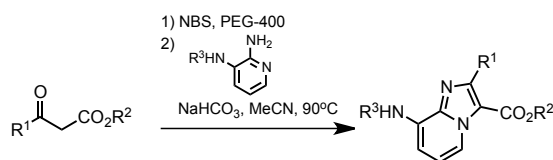

**General Procedure for the Synthesis of IP Scaffolds from  $\beta$ -ketoesters.** A mixture of  $\beta$ -ketoester (0.50 mmol) and solid *N*-bromosuccinimide (0.55 mmol) in PEG-400 (2 mL) was stirred at room temperature until TLC indicated consumption of the starting material (30-90 min). The reaction mixture was diluted with water and extracted with  $\text{Et}_2\text{O}$ . The combined organic layers were washed with water and brine, dried over  $\text{Na}_2\text{SO}_4$ , then filtered and concentrated. The crude residue was then dissolved in 2.5 mL MeCN and treated with either 2,3-diaminopyridine or  $\text{N}^2$ -amino- $\text{N}^3$ -benzyloxycarbonylaminopyridine (0.50 mmol) and  $\text{NaHCO}_3$

(0.55 mmol). The reaction mixture was heated to 90 °C in a sealed tube and stirred 15 h. The solution was then cooled to rt, diluted with EtOAc, filtered through a pad of celite, and concentrated. Purification by flash chromatography over silica gel (EtOAc/hexanes eluent) afforded the desired imidazo[1,2-*a*]pyridines.

**Methyl 8-amino-2-methylimidazo[1,2-*a*]pyridine-3-carboxylate (2a).** Yield: 53%; <sup>1</sup>H NMR (400 MHz, CDCl<sub>3</sub>) δ 8.71 (d, *J* = 6.8 Hz, 1H), 6.78 (t, *J* = 7.2 Hz, 1H), 6.54 (d, *J* = 7.5 Hz, 1H), 4.50 (s, 2H), 3.94 (s, 3H), 2.69 (s, 3H); <sup>13</sup>C NMR (101 MHz, CDCl<sub>3</sub>) δ 162.1, 151.1, 140.3, 135.1, 118.4, 114.8, 113.7, 106.5, 51.4, 16.7; HRMS (ESI-TOF) *m/z* [M+H]<sup>+</sup> calcd for C<sub>10</sub>H<sub>12</sub>N<sub>3</sub>O<sub>2</sub> 206.0924, found 206.0933.

**Ethyl 8-amino-2-phenylimidazo[1,2-*a*]pyridine-3-carboxylate (2b).** Yield: 55%; <sup>1</sup>H NMR (400 MHz, CDCl<sub>3</sub>) δ 8.81 (d, *J* = 6.9 Hz, 1H), 7.76 – 7.71 (m, 2H), 7.52 – 7.35 (m, 3H), 6.83 (t, *J* = 7.2 Hz, 1H), 6.56 (d, *J* = 7.5 Hz, 1H), 4.63 (s, 2H), 4.27 (q, *J* = 7.2 Hz, 2H), 1.19 (t, *J* = 6.8 Hz, 3H); <sup>13</sup>C NMR (101 MHz, CDCl<sub>3</sub>) δ 161.4, 152.2, 140.7, 135.9, 135.0, 130.3, 128.7, 127.8, 118.5, 115.4, 113.2, 106.3, 60.5, 14.2; HRMS (ESI-TOF) *m/z* [M + H]<sup>+</sup> calcd for C<sub>16</sub>H<sub>16</sub>N<sub>3</sub>O<sub>2</sub> 282.1237, found 282.1250.

**Methyl 8-(((benzyloxy)carbonyl)amino)-2-methylimidazo[1,2-*a*]pyridine-3-carboxylate (3a).** Yield: 80%; <sup>1</sup>H NMR (400 MHz, CDCl<sub>3</sub>) δ 8.92 (d, *J* = 6.9 Hz, 1H), 8.18 (s, 1H), 8.05 (d, *J* = 6.7 Hz, 1H), 7.46 – 7.31 (m, 5H), 6.96 (t, *J* = 7.3 Hz, 1H), 5.26 (s, 2H), 3.96 (s, 3H), 2.68 (s, 3H); <sup>13</sup>C NMR (101 MHz, CDCl<sub>3</sub>) δ 161.8, 153.3, 151.4, 139.8, 135.8, 128.7, 128.5, 128.3, 126.8, 121.8, 114.4, 114.1, 111.9, 67.5, 51.5, 16.5; HRMS (ESI-TOF) *m/z* [M + H]<sup>+</sup> calcd for C<sub>18</sub>H<sub>18</sub>N<sub>3</sub>O<sub>4</sub> 340.1292, found 340.1291.

**Ethyl 8-(((benzyloxy)carbonyl)amino)-2-phenylimidazo[1,2-*a*]pyridine-3-carboxylate (3b).** Yield: 92%. <sup>1</sup>H NMR (400 MHz, CDCl<sub>3</sub>) δ 9.03 (dd, *J* = 7.0, 0.9 Hz, 1H), 8.22 (bs, 1H),

8.10 (d,  $J = 7.3$  Hz, 1H), 7.78 – 7.69 (m, 2H), 7.51 – 7.30 (m, 8H), 7.02 (t,  $J = 7.3$  Hz, 1H), 5.27 (s, 2H), 4.31 (q,  $J = 7.1$  Hz, 2H), 1.22 (t,  $J = 7.1$  Hz, 3H);  $^{13}\text{C}$  NMR (101 MHz,  $\text{CDCl}_3$ )  $\delta$  161.2, 153.4, 152.3, 140.2, 135.9, 134.39, 130.3, 129.0, 128.8, 128.6, 128.5, 127.9, 127.6, 122.2, 115.0, 113.6, 112.0, 67.6, 60.8, 14.2. HRMS (ESI-TOF) ( $m/z$ )  $[\text{M}+\text{H}]^+$  calcd for  $\text{C}_{24}\text{H}_{22}\text{N}_3\text{O}_4$ , 416.1605, found 416.1605.

**Methyl 8-(((benzyloxy)carbonyl)amino)-2-(but-3-en-1-yl)imidazo[1,2-*a*]pyridine-3-carboxylate (3c).** Yield: 78%;  $^1\text{H}$  NMR (400 MHz,  $\text{CDCl}_3$ )  $\delta$  8.91 (d,  $J = 6.9$  Hz, 1H), 8.10 (s, 1H), 8.03 (d,  $J = 6.9$  Hz, 1H), 7.47 – 7.30 (m, 5H), 6.94 (t,  $J = 7.3$  Hz, 1H), 5.91 (ddt,  $J = 16.9$ , 10.2, 6.6 Hz, 1H), 5.25 (s, 2H), 5.07 (ddd,  $J = 17.1$ , 3.4, 1.6 Hz, 1H), 4.98 (ddt,  $J = 10.2$ , 2.0, 1.1 Hz, 1H), 3.95 (s, 3H), 3.19 – 3.09 (m, 2H), 2.51 (m, 2H);  $^{13}\text{C}$  NMR (101 MHz,  $\text{CDCl}_3$ )  $\delta$  161.6, 154.6, 153.2, 139.8, 138.00, 137.9, 135.6, 128.7, 128.4, 126.9, 121.8, 115.0, 114.3, 113.6, 111.7, 67.4, 51.5, 33.3, 29.4; HRMS (ESI-TOF)  $m/z$   $[\text{M} + \text{H}]^+$  calcd for  $\text{C}_{21}\text{H}_{22}\text{N}_3\text{O}_4$  380.1605, found 380.1614.

**Methyl 8-(((benzyloxy)carbonyl)amino)-2-(((4-methoxybenzyl)oxy)methyl)imidazo[1,2-*a*]pyridine-3-carboxylate (3d).** Yield: 39%;  $^1\text{H}$  NMR (400 MHz,  $\text{CDCl}_3$ )  $\delta$  8.93 (d,  $J = 7.0$  Hz, 1H), 8.21 (s, 1H), 8.08 (d,  $J = 7.0$  Hz, 1H), 7.48 – 7.28 (m, 10H), 7.00 (t,  $J = 7.3$  Hz, 1H), 5.26 (s, 2H), 4.95 (s, 2H), 4.71 (s, 2H), 3.87 (s, 3H);  $^{13}\text{C}$  NMR (101 MHz,  $\text{CDCl}_3$ )  $\delta$  161.1, 153.2, 149.8, 140.2, 137.9, 135.7, 128.6, 128.4, 128.3, 128.2, 128.1, 127.7, 127.5, 121.7, 115.0, 114.2, 111.9, 73.1, 67.4, 65.7, 51.6; HRMS (ESI-TOF)  $m/z$   $[\text{M} + \text{H}]^+$  calcd for  $\text{C}_{25}\text{H}_{24}\text{N}_3\text{O}_5$  446.1711, found 446.1702.

**Ethyl 8-(((benzyloxy)carbonyl)amino)-2-(4-(methoxymethoxy)phenyl)imidazo[1,2-*a*]pyridine-3-carboxylate (3e).** Yield: 75%;  $^1\text{H}$  NMR (400 MHz,  $\text{CDCl}_3$ )  $\delta$  9.00 (dd,  $J = 6.9$ , 0.9

Hz, 1H), 8.23 (s, 1H), 8.07 (d,  $J = 7.7$  Hz, 1H), 7.72 (d,  $J = 8.7$  Hz, 2H), 7.50 – 7.28 (m, 4H), 7.10 (m, 2H), 6.99 (t,  $J = 7.4$  Hz, 1H), 5.25 (s, 2H), 5.23 (s, 2H) 4.33 (q,  $J = 7.1$  Hz, 2H), 3.50 (s, 3H), 1.27 (t,  $J = 7.2$  Hz, 3H);  $^{13}\text{C}$  NMR (101 MHz,  $\text{CDCl}_3$ )  $\delta$  161.0, 157.8, 153.2, 139.9, 135.7, 131.6, 131.5, 128.6, 128.4, 128.2, 127.2, 122.0, 116.1, 115.4, 114.6, 113.0, 111.8, 94.3, 67.4, 60.6, 56.0, 14.1; HRMS (ESI-TOF) ( $m/z$ )  $[\text{M}+\text{H}]^+$  calcd for  $\text{C}_{26}\text{H}_{26}\text{N}_3\text{O}_6$ , 476.1822, found 476.1827.

**Methyl 8-(((benzyloxy)carbonyl)amino)-2-(2-(bis(*tert*-butoxycarbonyl)amino)ethyl)imidazo[1,2-*a*]pyridine-3-carboxylate (3f).** Yield: 72%;  $^1\text{H}$  NMR (400 MHz,  $\text{CDCl}_3$ )  $\delta$  8.92 (d,  $J = 6.9$  Hz, 1H), 8.12 (s, 1H), 8.02 (d,  $J = 6.1$  Hz, 1H), 7.49 – 7.31 (m, 5H), 6.95 (t,  $J = 7.3$  Hz, 1H), 5.27 (s, 2H), 4.02 (t,  $J = 7.0$  Hz, 2H), 3.96 (s, 3H), 3.36 (t,  $J = 7.0$  Hz, 2H), 1.42 (s, 18H);  $^{13}\text{C}$  NMR (101 MHz,  $\text{CDCl}_3$ )  $\delta$  161.6, 153.3, 152.7, 152.2, 140.1, 135.9, 128.8, 128.1, 128.5, 127.1, 121.8, 114.6, 114.2, 111.7, 82.2, 67.6, 51.7, 45.8, 29.6, 28.1; HRMS (ESI-TOF) ( $m/z$ )  $[\text{M}+\text{H}]^+$  calcd for  $\text{C}_{29}\text{H}_{37}\text{N}_4\text{O}_8$ , 569.2606, found 569.2615.

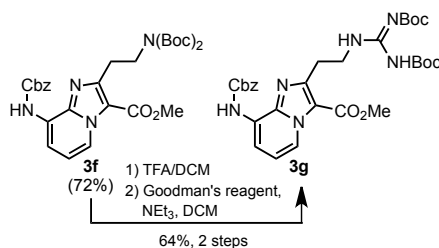

**Methyl 8-(((benzyloxy)carbonyl)amino)-2-(2-(2,3-bis(*tert*-butoxycarbonyl)guanidino)ethyl)imidazo[1,2-*a*]pyridine-3-carboxylate (3g).** A solution of **3f** (57 mg, 0.10 mmol) in 25% TFA in DCM (4 mL) was stirred for 2 h at rt. The reaction was diluted with EtOAc and concentrated under reduced pressure. This dilution/evaporation sequence

was repeated two more times to remove excess TFA and the crude material was dried under high vacuum. The crude TFA salt was dissolved in DCM (4 mL) and treated with NEt<sub>3</sub> (40 mg, 0.4 mmol) and 1,3-di-Boc-2-(trifluoromethyl sulfonyl)guanidine (47 mg, 0.12 mmol). The mixture was stirred for 3 h at rt. The mixture was then concentrated under reduced pressure and the residue was purified by silica gel flash chromatography (10% EtOAc/hexanes eluent) to give **3g** as white solid. (39 mg, 64% for 2 steps). <sup>1</sup>H NMR (400 MHz, CDCl<sub>3</sub>) δ 11.49 (s, 1H), 9.40 (s, 1H), 8.96 (d, *J* = 6.9 Hz, 1H), 8.32 (s, 1H), 8.08 (d, *J* = 7.6 Hz, 1H), 7.46 – 7.30 (m, 5H), 6.98 (t, *J* = 7.3 Hz, 1H), 5.26 (s, 2H), 3.94 (s, 3H), 3.92 – 3.84 (m, 2H), 3.33 (t, *J* = 6.0 Hz, 1H), 1.50 (s, 9H), 1.38 (s, 9H); <sup>13</sup>C NMR (101 MHz, CDCl<sub>3</sub>) δ 163.6, 161.4, 155.8, 153.5, 152.8, 152.2, 140.0, 135.8, 128.6, 128.4, 128.3, 127.2, 121.8, 114.6, 113.6, 112.8, 82.8, 79.3, 67.3, 51.5, 39.6, 28.7, 28.3, 27.9; HRMS (ESI-TOF) *m/z* [M + H]<sup>+</sup> calcd for C<sub>30</sub>H<sub>38</sub>N<sub>6</sub>O<sub>8</sub> 611.2824, found 611.2821.

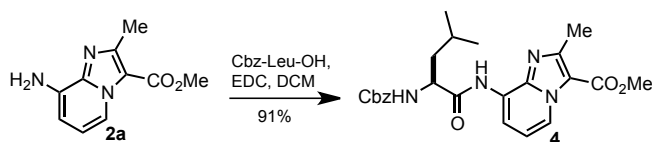

**Cbz-Leu-IP(Me)-OMe (4).** To a solution of Cbz-Leu-OH (265 mg, 1.00 mmol) and **2a** (103 mg, 0.50 mmol) in DCM (10 mL) was added EDC·HCl (192 mg, 1.00 mmol) at rt. After stirring 24 h at rt, the solvent was removed under reduced pressure and the residue was purified by silica gel flash chromatography (20% EtOAc/hexanes eluent) to give **4** as a pale yellow form (207 mg, 91%). <sup>1</sup>H NMR (400 MHz, CDCl<sub>3</sub>) δ 9.27 (s, 1H), 8.93 (d, *J* = 6.9 Hz, 1H), 8.29 (d, *J* = 7.7 Hz, 1H), 7.39 – 7.22 (m, 5H), 6.90 (t, *J* = 7.3 Hz, 1H), 5.54 (d, *J* = 7.9 Hz, 1H), 5.13 (s, 2H), 4.59 – 4.48 (m, 1H), 3.96 (s, 3H), 2.67 (s, 3H), 1.83 – 1.75 (m, 2H), 1.69 – 1.61 (m, 1H), 0.96 (d, *J* =

5.9 Hz, 6H);  $^{13}\text{C}$  NMR (101 MHz,  $\text{CDCl}_3$ )  $\delta$  172.1, 161.8, 156.5, 151.4, 140.0, 136.4, 128.7, 128.4, 128.3, 126.4, 123.0, 114.7, 114.5, 114.0, 67.4, 54.8, 51.7, 41.8, 25.0, 23.3, 22.0, 16.5; HRMS (ESI-TOF)  $m/z$   $[\text{M} + \text{H}]^+$  calcd for  $\text{C}_{24}\text{H}_{29}\text{N}_4\text{O}_5$  453.2133, found 453.2151.

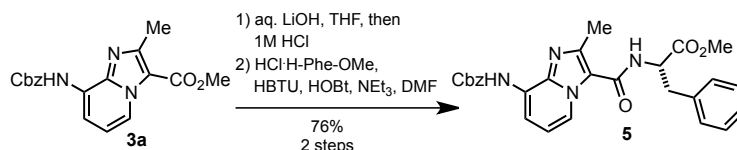

**Cbz-IP(Me)-Phe-OMe (5).** A solution of **3a** (154 mg, 0.45 mmol) and  $\text{LiOH}\cdot\text{H}_2\text{O}$  (38 mg, 0.90 mmol) in 6 mL of 1:1 THF: $\text{H}_2\text{O}$  was stirred for 17 h at rt. The reaction was quenched with 1M aq. HCl (0.45 mL, 0.45 mmol) and concentrated. The hydrolyzed intermediate was dried under high vacuum to remove excess water. The crude mixture was dissolved in DMF (6 mL) and treated with  $\text{NEt}_3$  (184 mg, 1.80 mmol), H-Phe-OMe  $\cdot$  HCl (117 mg, 0.54 mmol), HBTU (206 mg, 0.54 mmol), and HOBT (12 mg, 0.09 mmol). The reaction was stirred for 24 h at rt. The solvent was evaporated under reduced pressure and the residue was diluted with EtOAc, washed with water and brine, dried over  $\text{MgSO}_4$ , and filtered. The organic layers were concentrated under reduced pressure and the residue was purified by silica gel flash chromatography (30% EtOAc/hexanes eluent) to give **5** as pale yellow foam (167 mg, 76% over 2 steps).  $^1\text{H}$  NMR (400 MHz,  $\text{CDCl}_3$ )  $\delta$  8.97 (d,  $J = 7.0$  Hz, 1H), 8.00 (s, 1H), 7.96 (d,  $J = 7.1$  Hz, 1H), 7.45 – 7.33 (m, 4H), 7.33 – 7.23 (m, 4H), 7.13 (dd,  $J = 7.7, 1.6$  Hz, 2H), 6.88 (t,  $J = 7.3$  Hz, 1H), 6.22 (d,  $J = 7.2$  Hz, 1H), 5.24 (s, 2H), 5.14 – 5.06 (m, 1H), 3.81 (s, 3H), 3.33 (dd,  $J = 13.9, 5.6$  Hz, 1H), 3.24 (dd,  $J = 13.9, 5.6$  Hz, 1H), 2.44 (s, 3H);  $^{13}\text{C}$  NMR (101 MHz,  $\text{CDCl}_3$ )  $\delta$  172.1, 160.7, 153.2, 144.8, 139.1, 135.7, 135.6, 129.3, 128.7, 128.6, 128.4, 128.3, 127.4, 126.5, 121.9, 116.3, 113.9,

111.2, 67.3, 53.2, 52.6, 37.3, 16.2; HRMS (ESI-TOF)  $m/z$   $[M + H]^+$  calcd for  $C_{27}H_{27}N_4O_5$  487.1976, found 487.1974.

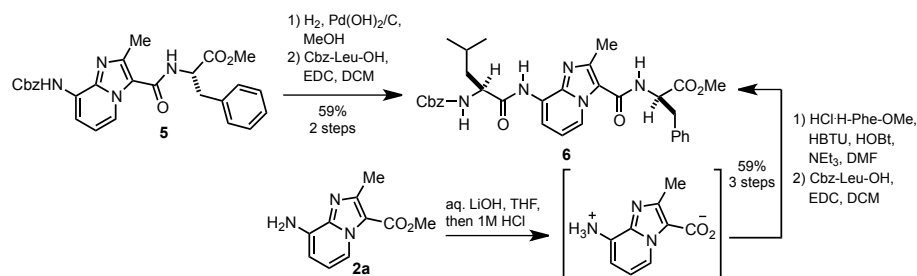

**Cbz-Leu-IP(Me)-Phe-OMe (6).** A mixture of **5** (107 mg, 0.22 mmol) and a catalytic amount of 10% Pd(OH)<sub>2</sub>/C (0.2 g/mmol, 44 mg) in MeOH (6 mL) was stirred under H<sub>2</sub> atmosphere (balloon) for 1 h at rt. The crude mixture was filtered through celite and the filtrate was concentrated under reduced pressure. The crude amine was dissolved in DCM (6 mL) and treated with Cbz-Leu-OH (117 mg, 0.44 mmol) and EDC·HCl (85 mg, 0.44 mmol). After stirring 24 h at rt, the mixture was concentrated and the residue was purified by silica gel flash chromatography (30% EtOAc/hexanes) to give **6** as pale yellow solid. (78 mg, 59% over 2 steps). <sup>1</sup>H NMR (400 MHz, CDCl<sub>3</sub>) δ 9.17 (s, 1H), 9.00 (d,  $J = 6.9$  Hz, 1H), 8.23 (d,  $J = 7.6$  Hz, 1H), 7.42 – 7.22 (m, 8H), 7.19 – 7.08 (m, 2H), 6.85 (t,  $J = 7.3$  Hz, 1H), 6.27 (d,  $J = 7.1$  Hz, 1H), 5.43 (d,  $J = 8.0$  Hz, 1H), 5.13 (s, 2H), 5.11 – 5.05 (m, 1H), 4.53 – 4.44 (m, 1H), 3.81 (s, 3H), 3.34 (dd,  $J = 13.9, 5.6$  Hz, 1H), 3.24 (dd,  $J = 13.9, 5.7$  Hz, 1H), 2.45 (s, 3H), 1.79 – 1.70 (m, 2H), 1.68 – 1.60 (m, 1H), 0.99 – 0.92 (m, 6H); <sup>13</sup>C NMR (101 MHz, CDCl<sub>3</sub>) δ 172.1, 171.6, 160.6, 156.2, 144.8, 139.3, 136.1, 135.6, 129.3, 128.7, 128.5, 128.2, 128.0, 127.4, 126.0, 122.9, 116.3, 113.8, 113.6, 67.2, 54.4, 53.2, 52.6, 41.6, 37.7, 24.8, 23.0, 21.8, 16.1; HRMS (ESI-TOF)  $m/z$   $[M + H]^+$  calcd for  $C_{33}H_{38}N_5O_6$  600.2817, found 600.2808.



Alternatively, **6** could be prepared from **2a** in improved overall yield using the following procedure: A solution of **2a** (205 mg, 1.00 mmol) and LiOH·H<sub>2</sub>O (126 mg, 3.00 mmol) in 8 mL of 1:1 THF:H<sub>2</sub>O was stirred for 17 h at rt. The reaction was quenched with 2 mL of 1M aq. HCl and concentrated under reduced pressure. The hydrolyzed intermediate dried under high vacuum to remove excess water. The crude zwitterion was dissolved in DMF (10 mL) and treated with NEt<sub>3</sub> (405 mg, 4.00 mmol), HCl·H<sub>2</sub>N-Phe-OMe (216 mg, 1.00 mmol), HBTU (455 mg, 1.20 mmol), and HOBt (27 mg, 0.20 mmol). The reaction was stirred for 24 h at rt. The reaction was concentrated and the remaining residue was diluted with EtOAc, washed with water and brine, and dried over MgSO<sub>4</sub>. The organic layers were concentrated under reduced pressure and the residue was purified by passage through a silica gel pad (50% EtOAc/hexanes eluent) to give the amide intermediate. To a solution of this amide in 10 mL of DCM was added Cbz-Leu-OH (530 mg, 2.00 mmol) and EDC·HCl (383 mg, 2.00 mmol) at rt. After stirring 24 h at rt, the reaction was concentrated, and the residue was purified by silica gel flash chromatography (30% EtOAc/hexanes eluent) to give **6** as pale yellow solid (353 mg, 59% over 3 steps).

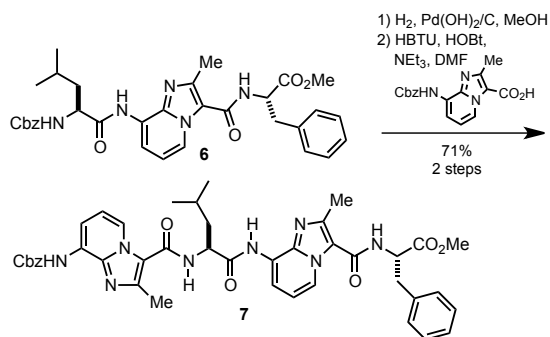

**Cbz-IP1(Me)-Leu-IP2(Me)-Phe-OMe (7)**. A mixture of **6** (60 mg, 0.10 mmol) and a catalytic amount of 10% Pd(OH)<sub>2</sub>/C (20 mg) in MeOH (5 mL) was stirred under H<sub>2</sub> atmosphere

(balloon) for 1 h at rt. The crude mixture was filtered through celite and the filtrate was concentrated to give the crude amine. Separately, a solution of **3a** (40 mg, 0.12 mmol) and LiOH·H<sub>2</sub>O (10 mg, 0.24 mmol) in 3 mL of 1:1 THF:H<sub>2</sub>O was stirred for 17 h at rt. The reaction was neutralized with 120 μL of 1M aq. HCl and concentrated. The hydrolyzed intermediate was dried under high vacuum. Both the crude carboxylic acid and amine from above crude materials were dissolved in DMF (8 mL) and treated with NEt<sub>3</sub> (47 mg, 0.48 mmol), HBTU (53 mg, 0.14 mmol), and HOBt (3.2 mg, 23 μmol). The reaction was stirred for 24 h at rt. The mixture was concentrated and the remaining residue diluted with EtOAc, washed with water and brine, and dried over MgSO<sub>4</sub>. The organic layer was concentrated under reduced pressure and the residue was purified by silica gel flash chromatography (50% EtOAc/hexanes eluent) to give **7** as pale yellow solid. (55 mg, 71% for 2 steps). <sup>1</sup>H NMR (400 MHz, CDCl<sub>3</sub>) δ 9.34 (s, 1H), 9.03 (dd, *J* = 6.9, 1.0 Hz, 1H), 9.02 (dd, *J* = 6.9, 1.0 Hz, 1H), 8.25 (d, *J* = 7.3 Hz, 1H), 8.04 (s, 1H), 7.97 (d, *J* = 6.8 Hz, 1H), 7.45 – 7.26 (m, 8H), 7.13 (dd, *J* = 7.6, 1.8 Hz, 2H), 6.88 (t, *J* = 7.2 Hz, 1H), 6.87 (t, *J* = 7.6 Hz, 1H), 6.35 (d, *J* = 6.4 Hz, 1H), 6.24 (d, *J* = 7.3 Hz, 1H), 5.25 (s, 2H), 5.09 (dd, *J* = 12.8, 5.6 Hz, 1H), 5.01 (dd, *J* = 11.0, 5.9 Hz, 1H), 3.82 (s, 3H), 3.34 (dd, *J* = 13.9, 5.6 Hz, 1H), 3.24 (dd, *J* = 13.9, 5.6 Hz, 1H), 2.77 (s, 3H), 2.46 (s, 3H), 1.91 – 1.75 (m, 3H), 1.04 – 1.01 (m, 6H); <sup>13</sup>C NMR (101 MHz, CDCl<sub>3</sub>) δ 172.1, 171.4, 161.3, 160.6, 153.2, 144.8, 144.7, 139.3, 139.2, 135.7, 135.6, 129.3, 128.7, 128.6, 128.4, 128.3, 127.4, 126.5, 126.0, 123.0, 122.0, 116.4, 116.3, 113.9, 113.8, 113.7, 111.3, 67.3, 53.2, 52.7, 52.6, 41.6, 37.7, 25.1, 23.1, 22.0, 16.5, 16.2; HRMS (ESI-TOF) *m/z* [M + H]<sup>+</sup> calcd for C<sub>42</sub>H<sub>45</sub>N<sub>8</sub>O<sub>7</sub> 773.3406, found 773.3401.

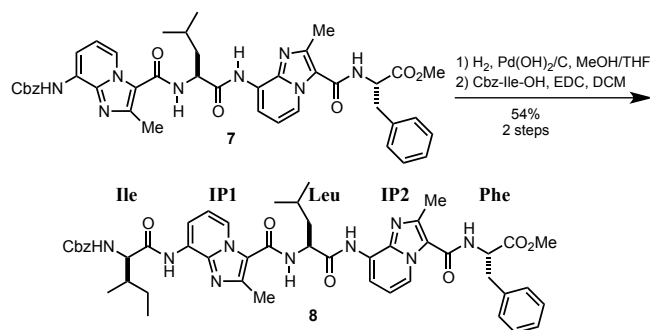

**Cbz-Ile-IP1(Me)-Leu-IP2(Me)-Phe-OMe (8).** A mixture of **7** (24.5 mg, 0.032 mmol) and a catalytic amount of 10% Pd(OH)<sub>2</sub>/C (6 mg) in 6 mL of 2:1 MeOH:THF was stirred under H<sub>2</sub> atmosphere (balloon) for 1 h at rt. The crude mixture was filtered through celite and the filtrate was concentrated under reduced pressure. The crude amine was dissolved in DCM (6 mL) and treated with Cbz-Ile-OH (17 mg, 64 μmol) and EDC·HCl (12 mg, 64 μmol). After stirring 24 h at rt, the solvent was evaporated, and the residue was purified by silica gel flash chromatography (2:1:1 EtOAc:hexanes:CHCl<sub>3</sub> eluent) to give **8** as pale yellow solid. (15 mg, 54% for 2 steps). <sup>1</sup>H NMR (400 MHz, CDCl<sub>3</sub>) δ 9.37 (s, 1H), 9.09 (s, 1H), 9.05 (d, *J* = 6.9 Hz, 1H), 9.02 (d, *J* = 6.9 Hz, 1H), 8.26 (d, *J* = 8.0 Hz, 1H), 8.24 (d, *J* = 7.8 Hz, 1H), 7.42 – 7.23 (m, 8H), 7.13 (d, *J* = 6.1 Hz, 2H), 6.87 (t, *J* = 7.5 Hz, 1H), 6.85 (t, *J* = 7.6 Hz, 1H), 6.45 (d, *J* = 7.8 Hz, 1H), 6.26 (d, *J* = 7.2 Hz, 1H), 5.50 (d, *J* = 8.7 Hz, 1H), 5.14 (s, 2H), 5.09 (dd, *J* = 12.7, 5.7 Hz, 1H), 5.04 – 4.96 (m, 1H), 4.51 – 4.26 (m, 1H), 3.81 (s, 3H), 3.33 (dd, *J* = 13.9, 5.6 Hz, 1H), 3.24 (dd, *J* = 13.9, 5.6 Hz, 1H), 2.77 (s, 3H), 2.46 (s, 3H), 2.02 – 1.95 (m, 1H), 1.95 – 1.88 (m, 1H), 1.86 – 1.77 (m, 2H), 1.61 – 1.51 (m, 1H), 1.22 – 1.14 (m, 1H), 1.05 – 0.86 (m, 12H); <sup>13</sup>C NMR (101 MHz, CDCl<sub>3</sub>) δ 172.1, 171.4, 170.8, 161.2, 160.6, 144.8, 144.7, 139.3, 139.2, 135.6, 129.3, 128.7, 128.5, 128.2, 128.1, 127.4, 126.0, 125.9, 123.1, 123.0, 116.5, 116.3, 116.0, 113.8, 113.7, 113.5, 67.2, 60.45, 53.2, 52.6, 52.5, 41.6, 37.7, 29.9, 25.1, 24.6, 23.1, 22.0, 16.5, 16.2, 15.6, 11.4; HRMS (ESI-TOF) *m/z* [M + H]<sup>+</sup> calcd for C<sub>48</sub>H<sub>56</sub>N<sub>9</sub>O<sub>8</sub> 886.4246, found 886.4227.

# 1D NMR SPECTRA

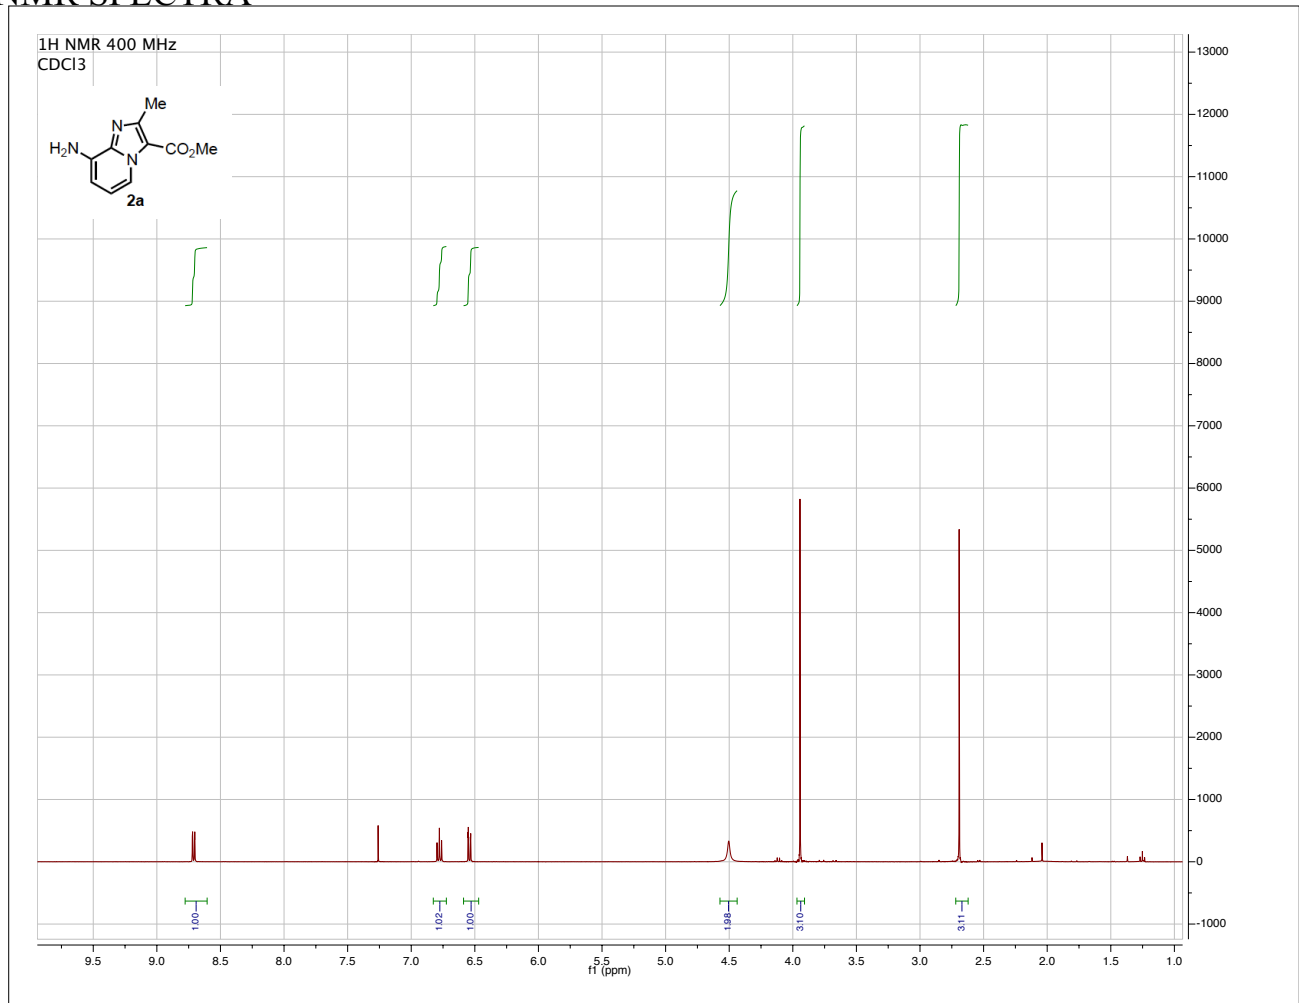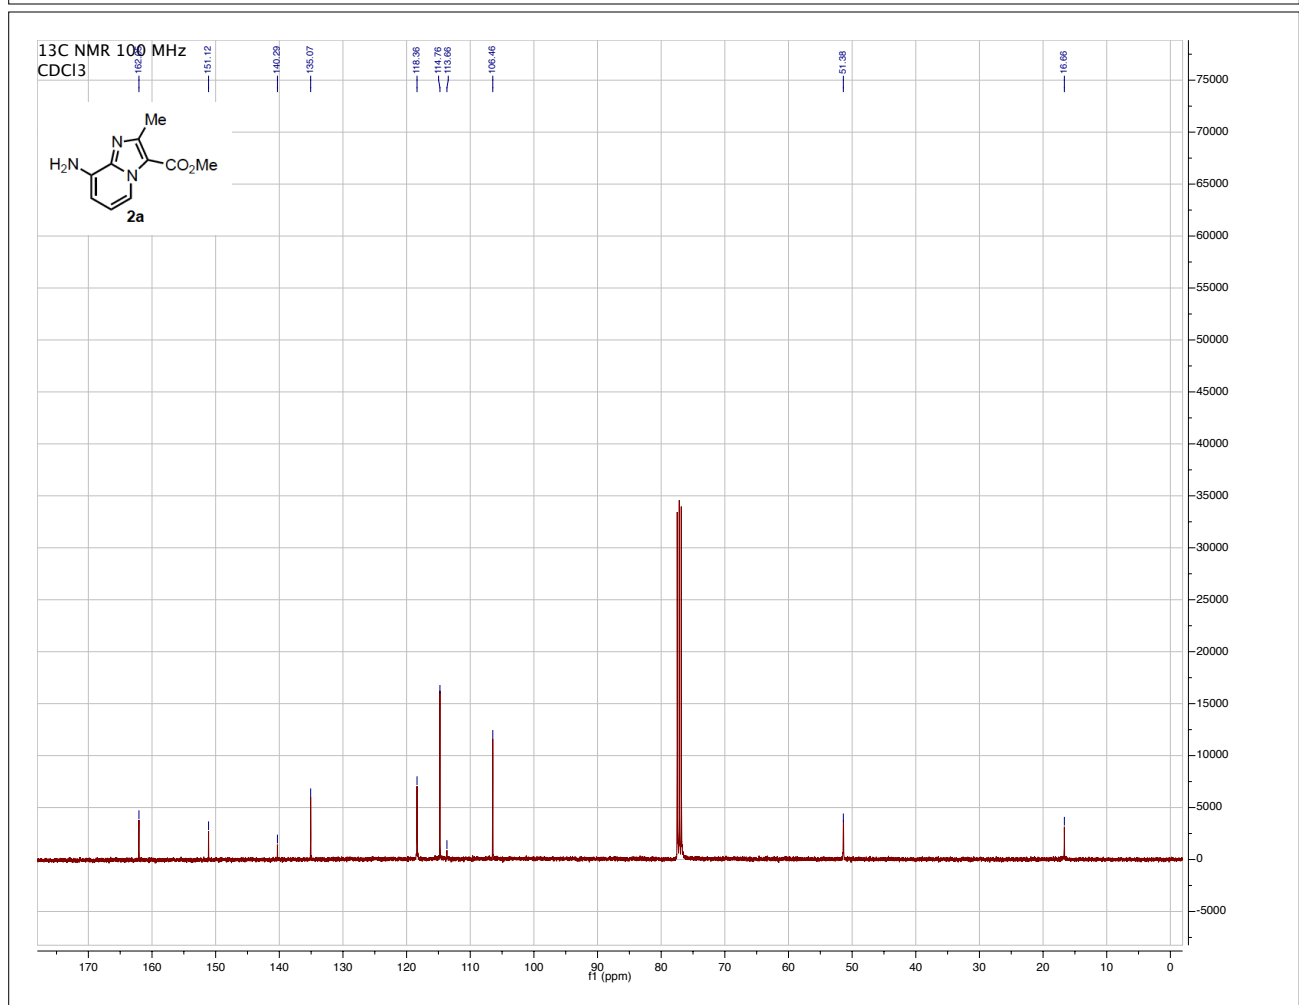

<sup>1</sup>H NMR 400 MHz  
CDCl<sub>3</sub>

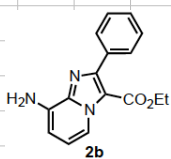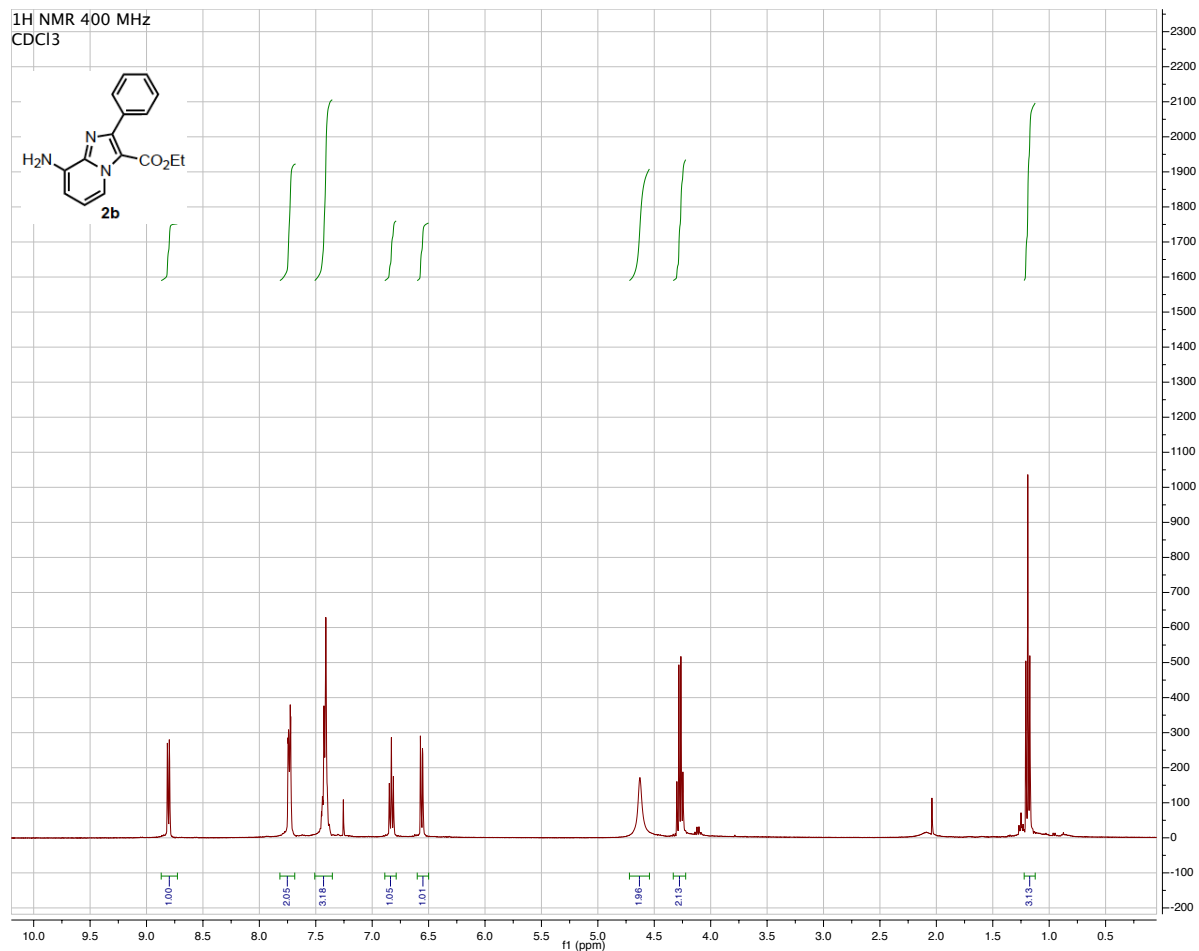

<sup>13</sup>C NMR 100 MHz  
CDCl<sub>3</sub>

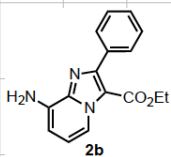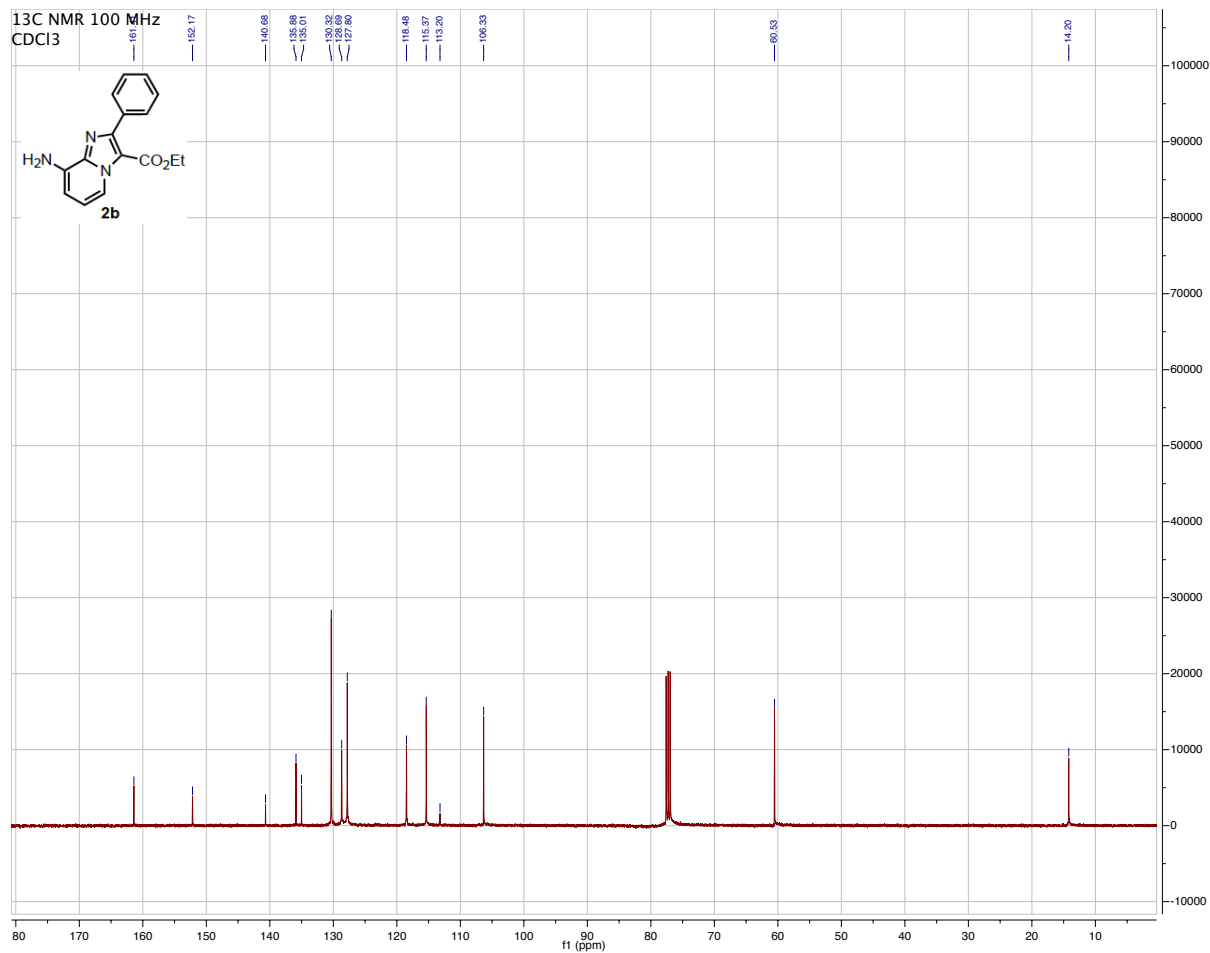

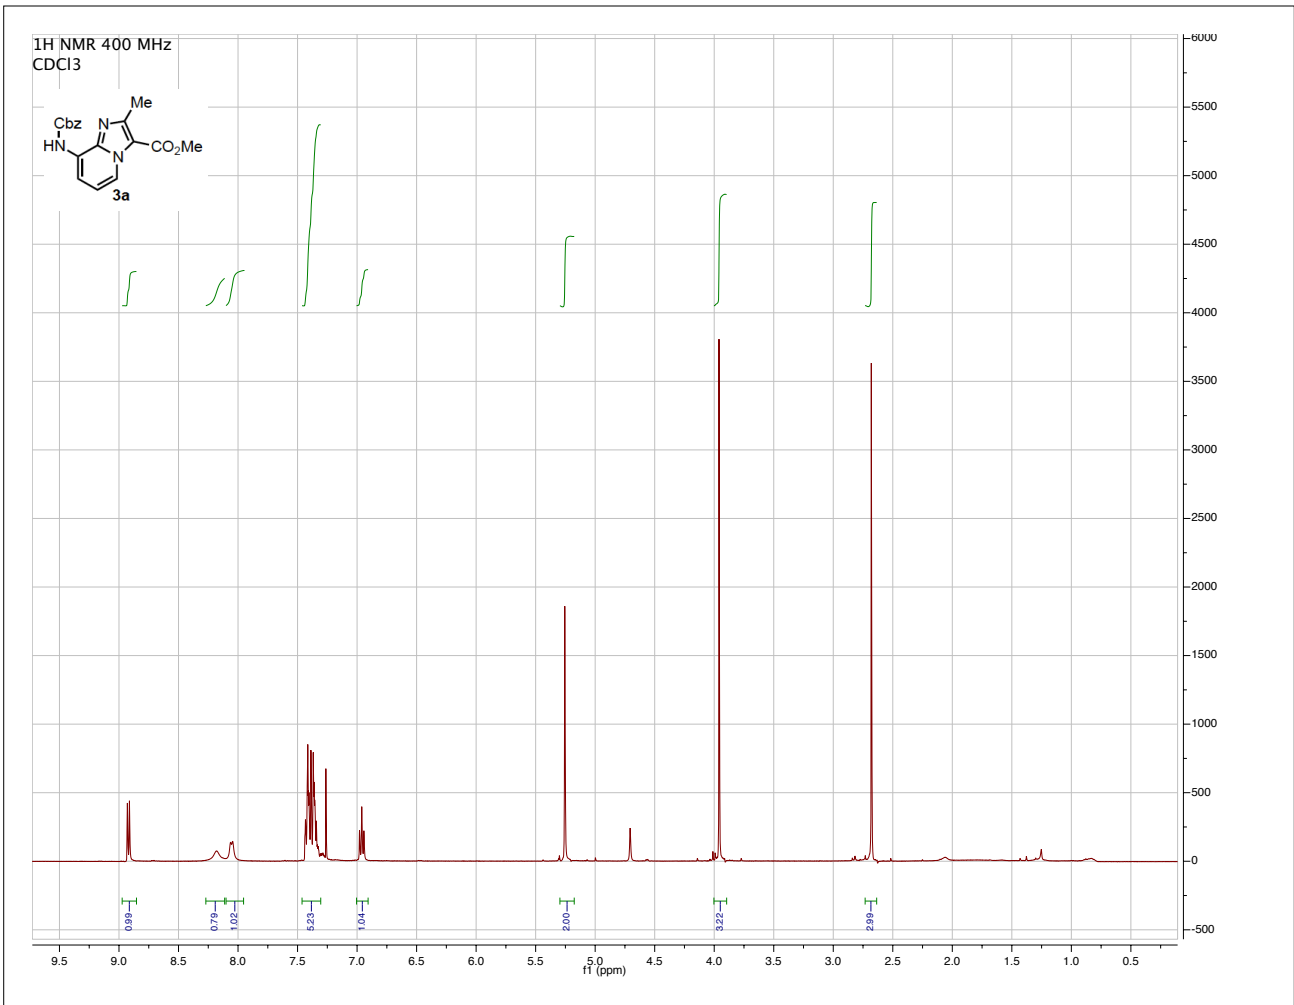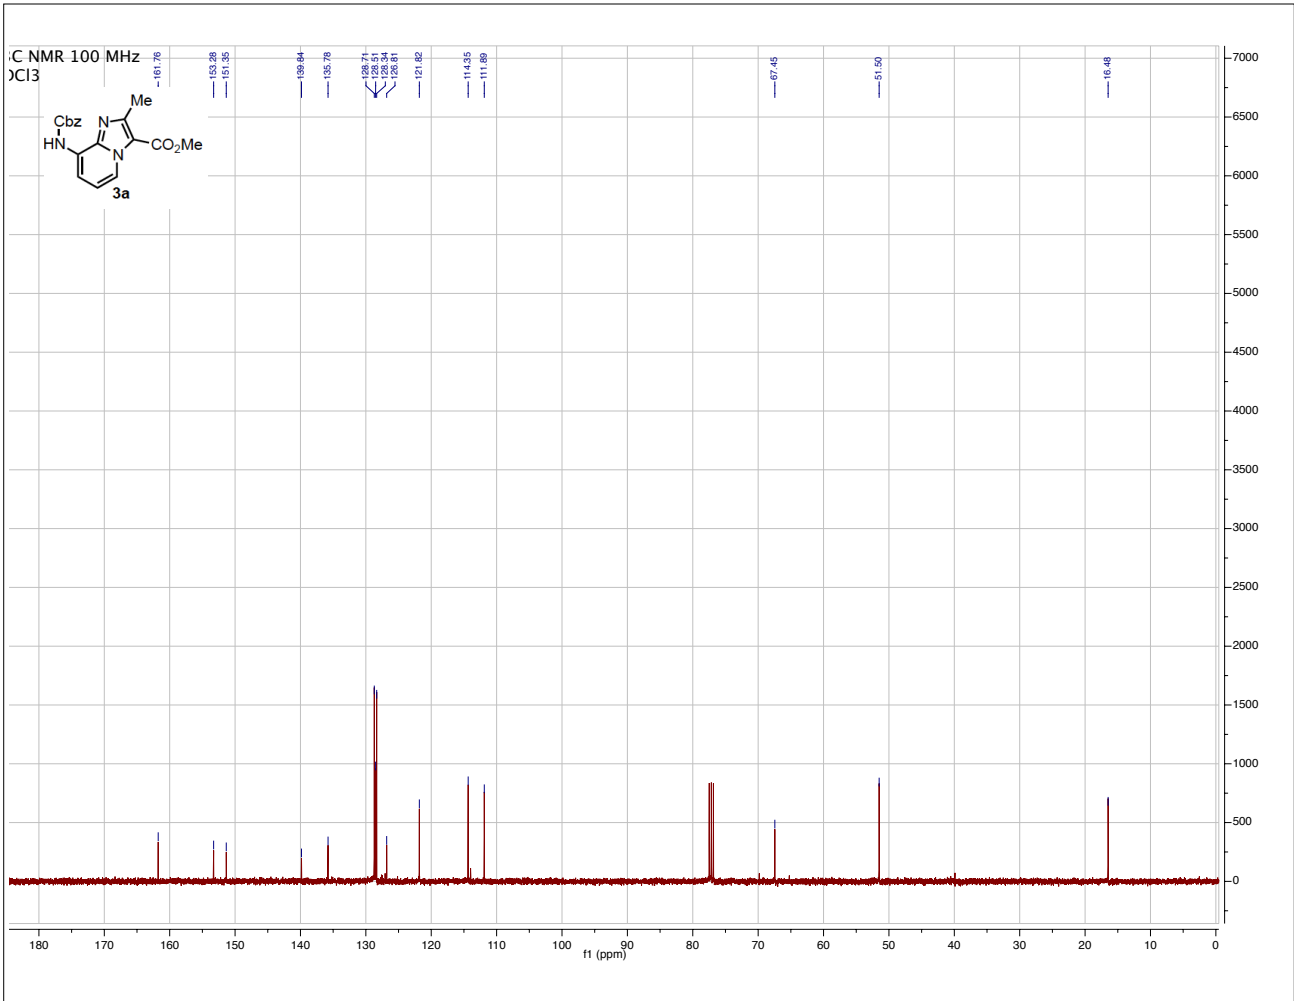

<sup>1</sup>H NMR 400 MHz  
CDCl<sub>3</sub>

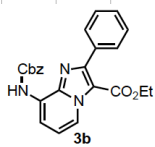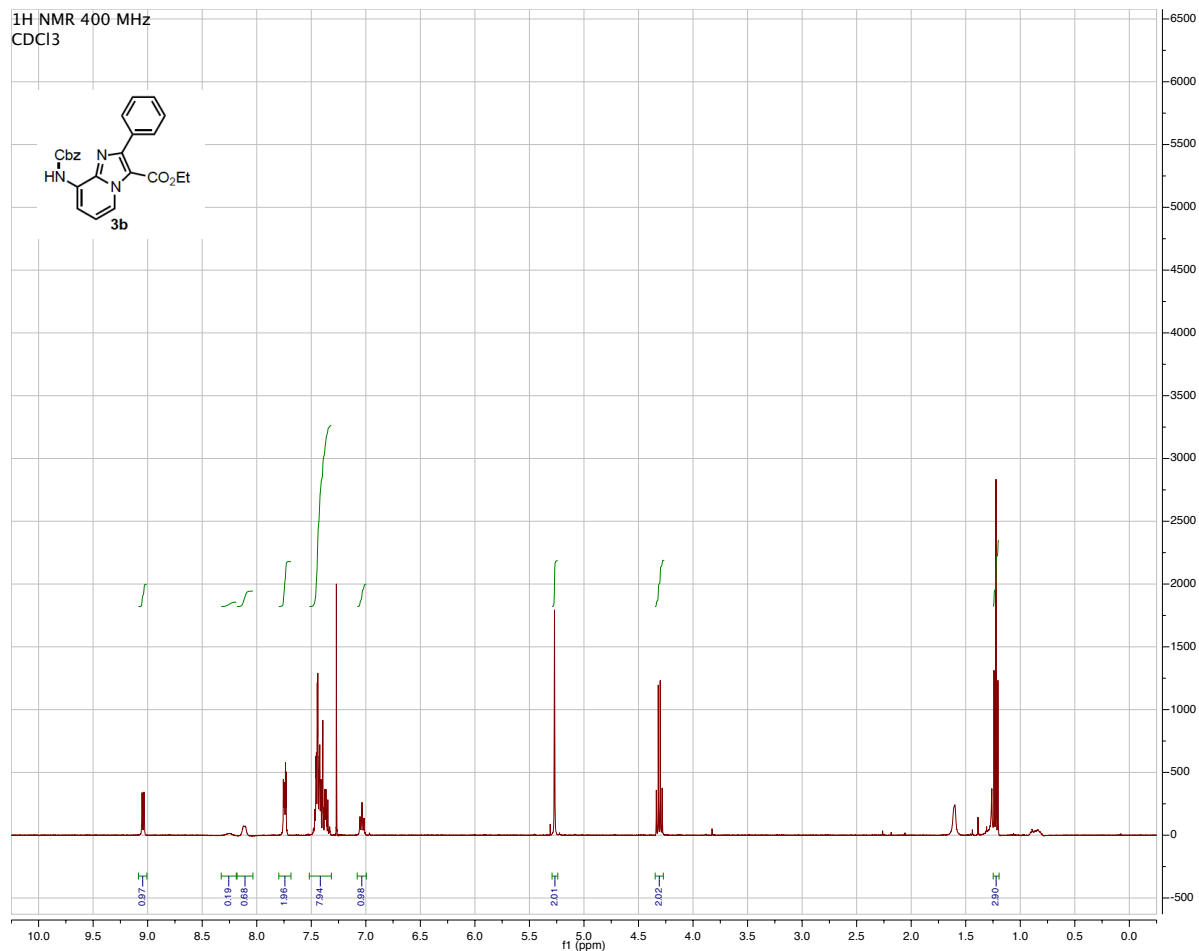

<sup>13</sup>C NMR 100 MHz  
CDCl<sub>3</sub>

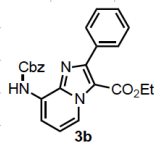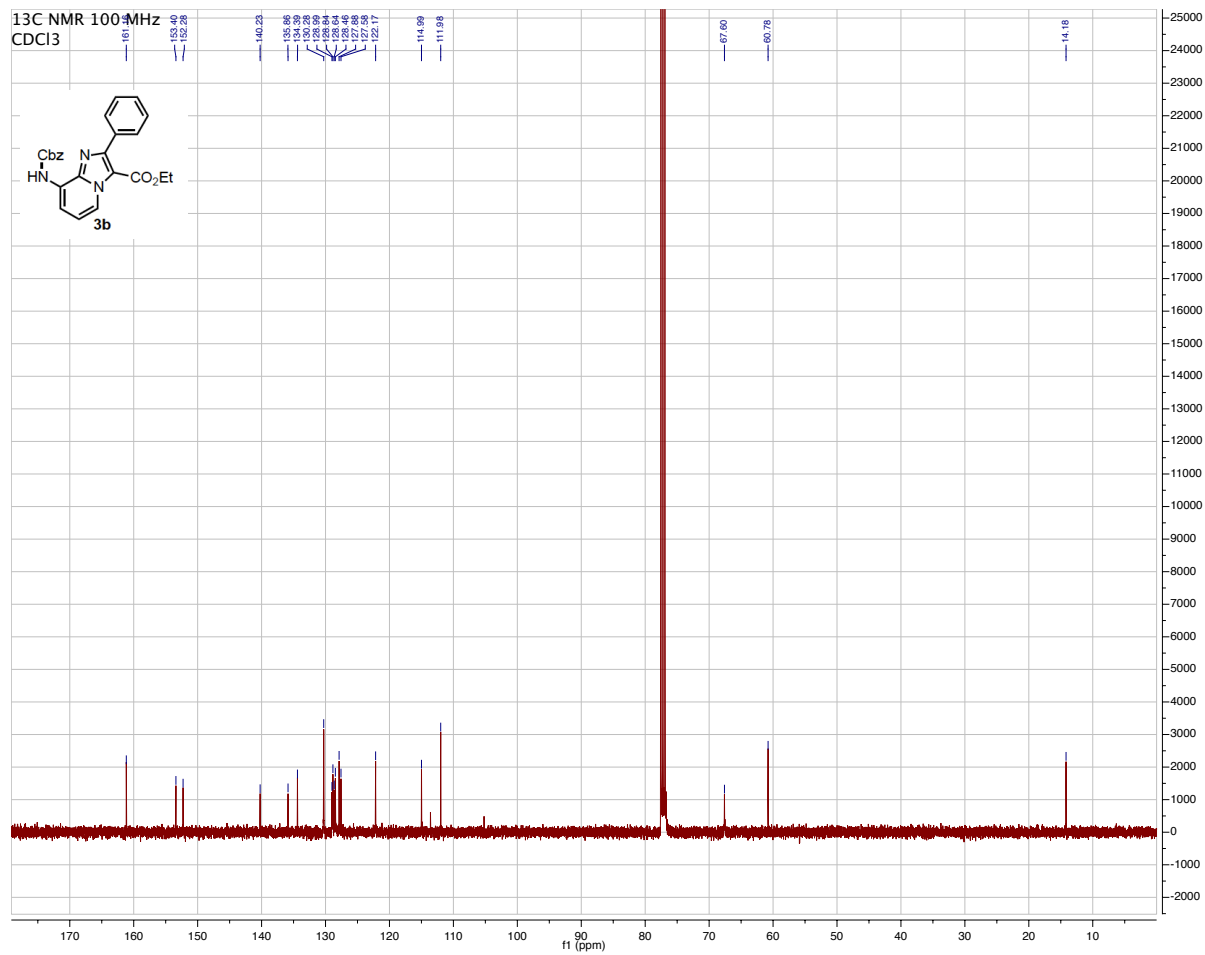

<sup>1</sup>H NMR 400 MHz  
CDCl<sub>3</sub>

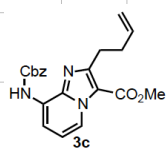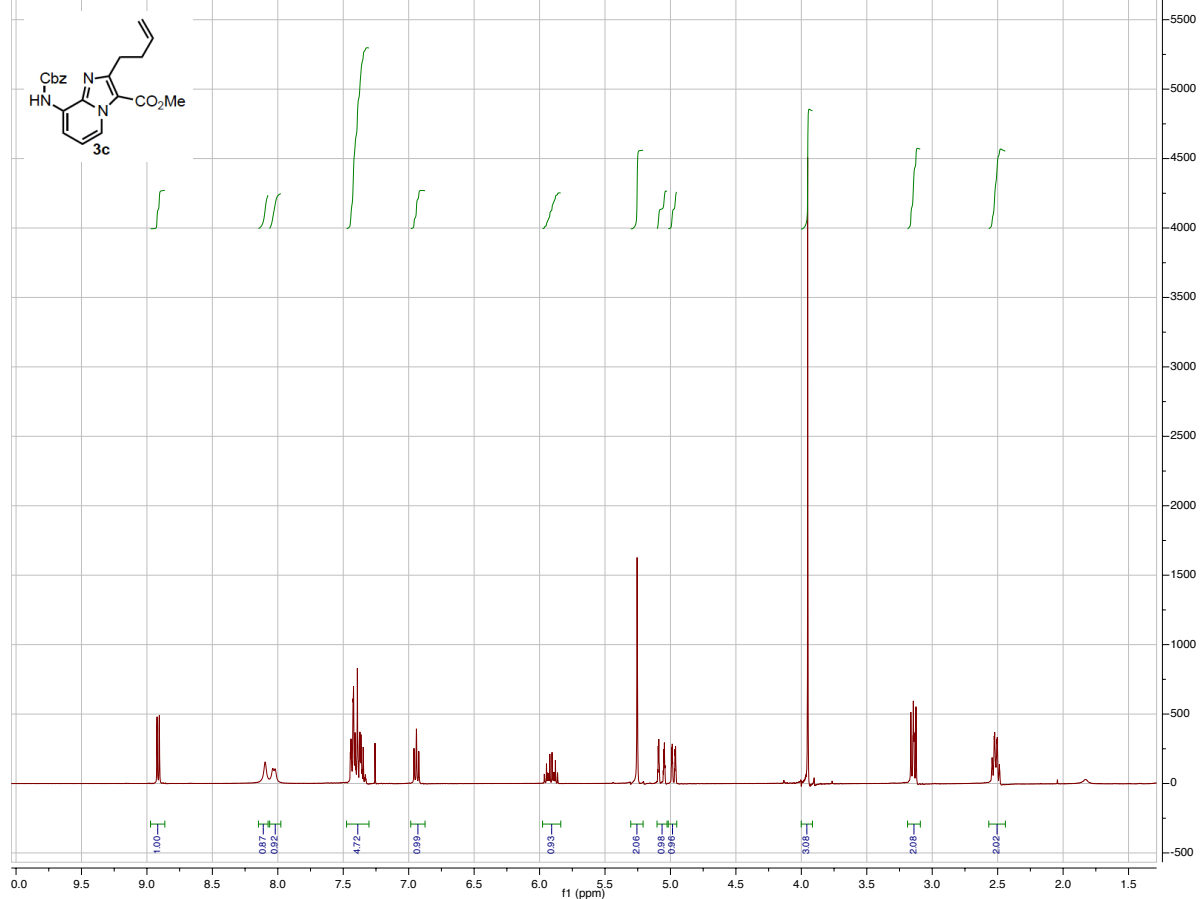

<sup>13</sup>C NMR 100 MHz  
CDCl<sub>3</sub>

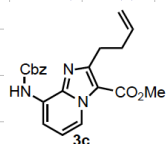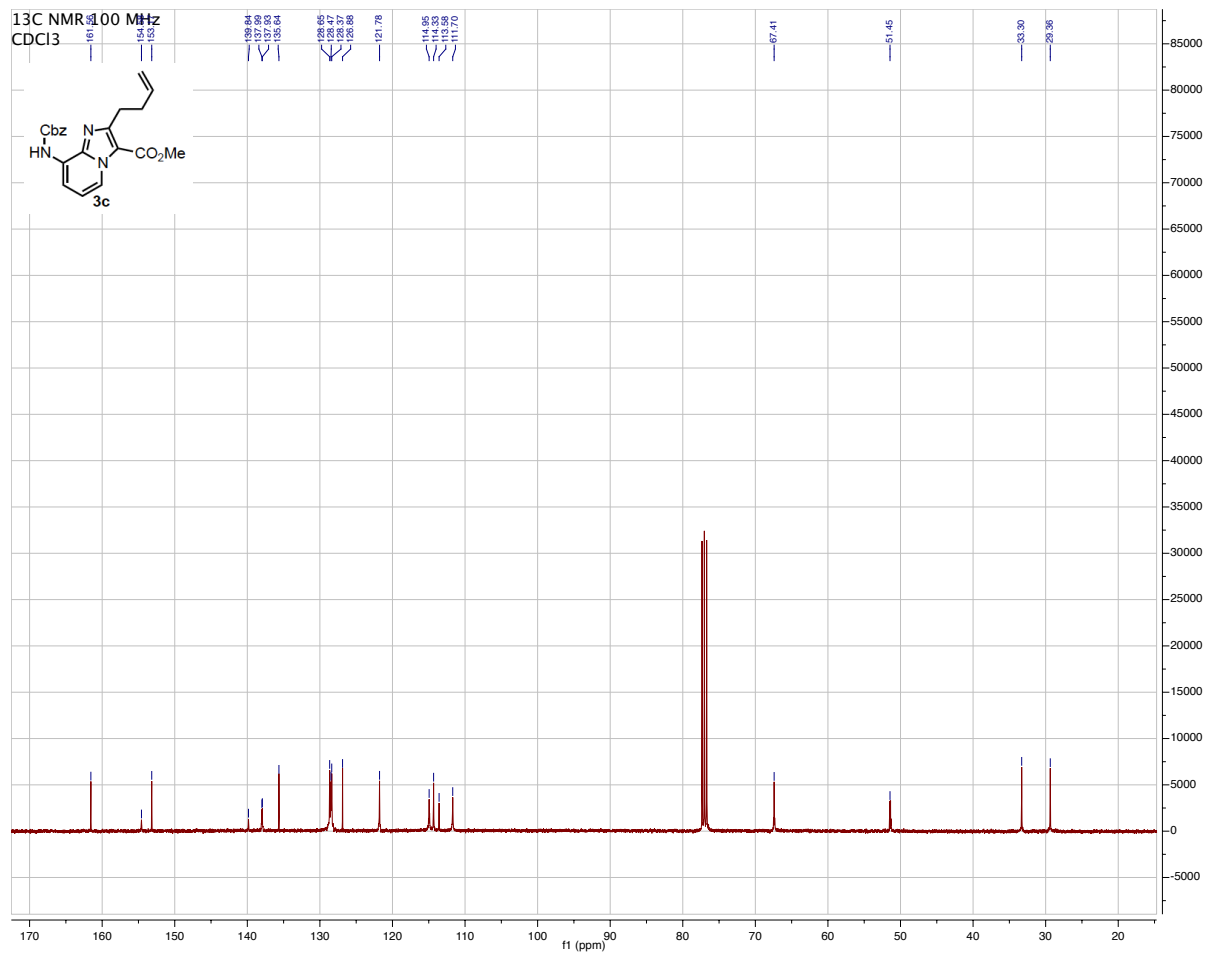



<sup>1</sup>H NMR 400 MHz  
CDCl<sub>3</sub>

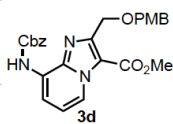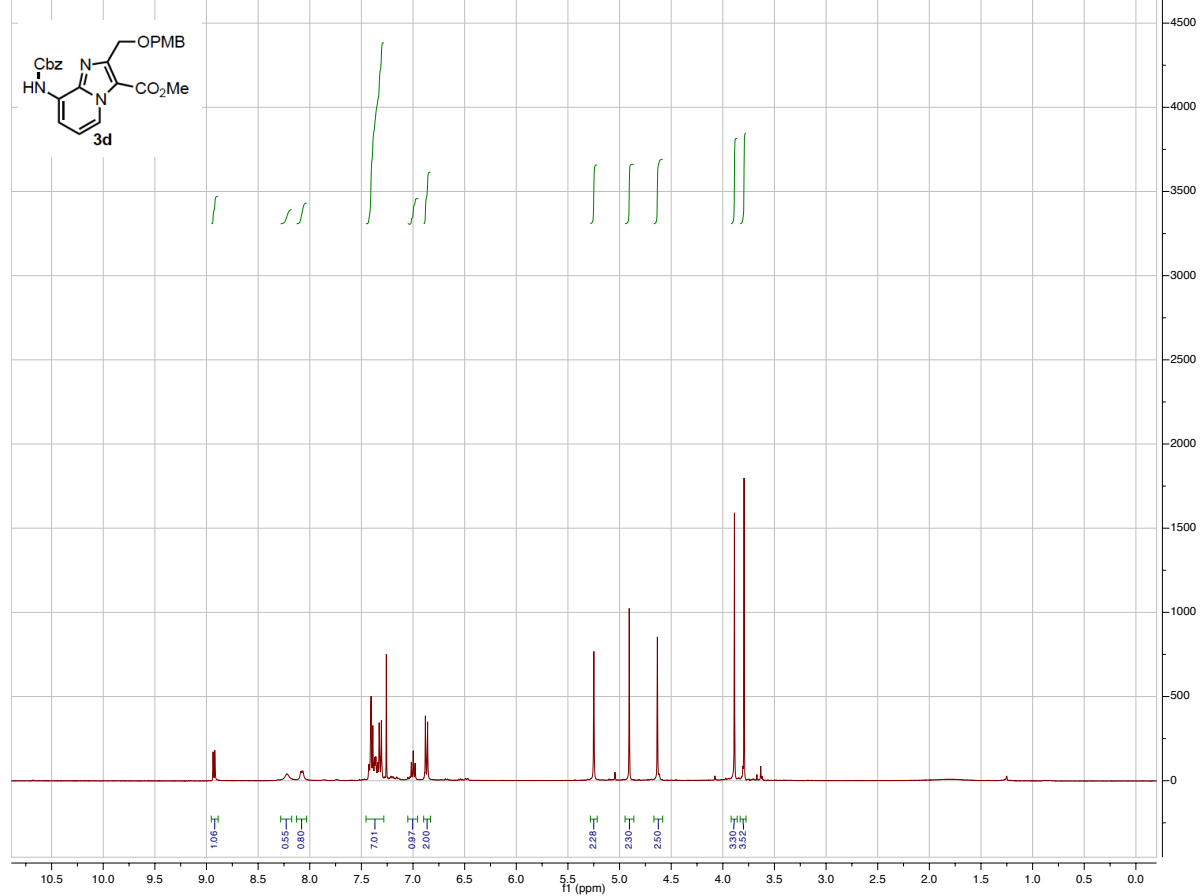

<sup>13</sup>C NMR 100 MHz  
CDCl<sub>3</sub>

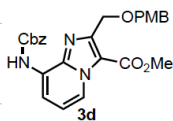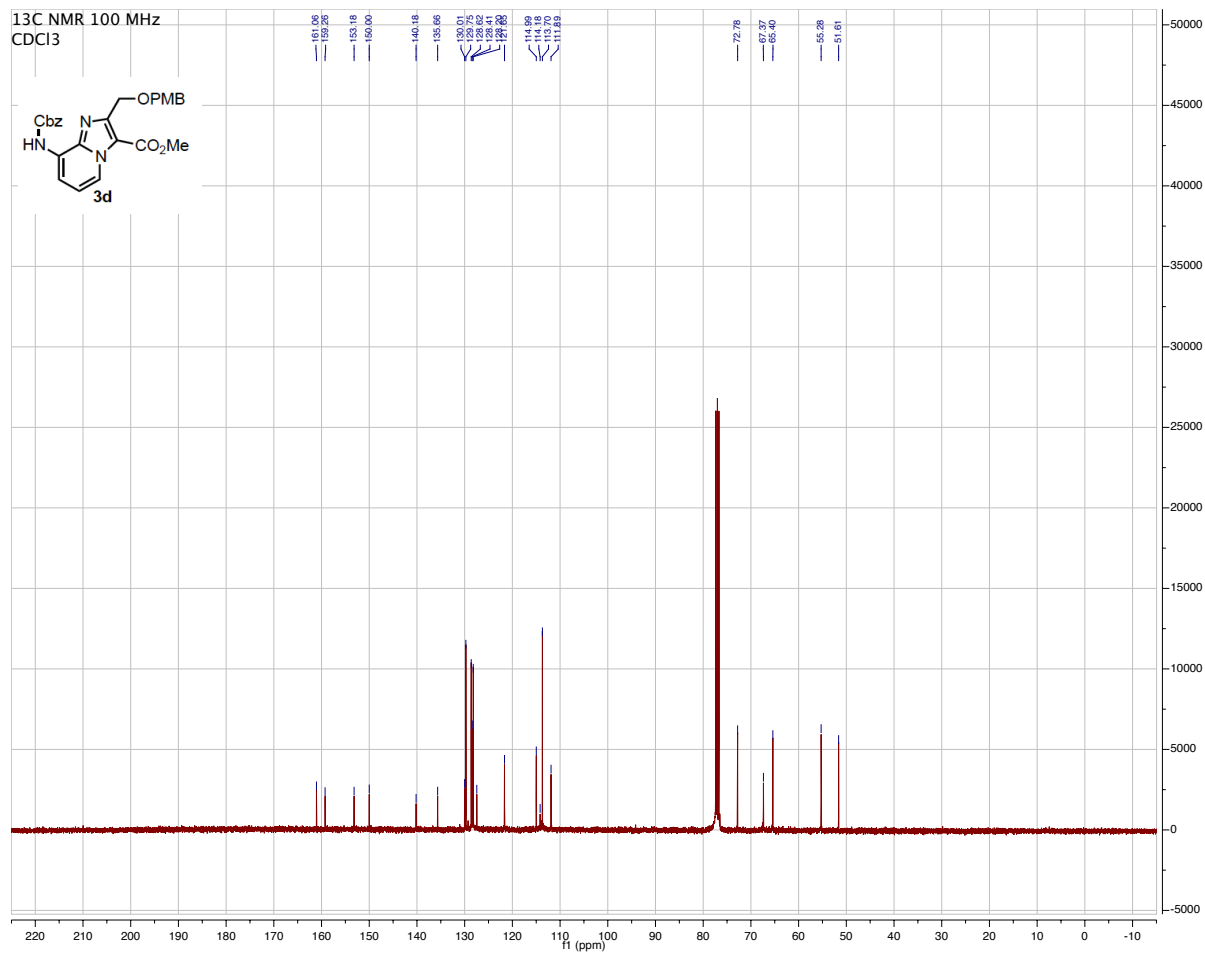

<sup>1</sup>H NMR 400 MHz  
CDCl<sub>3</sub>

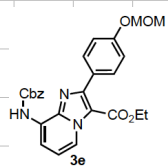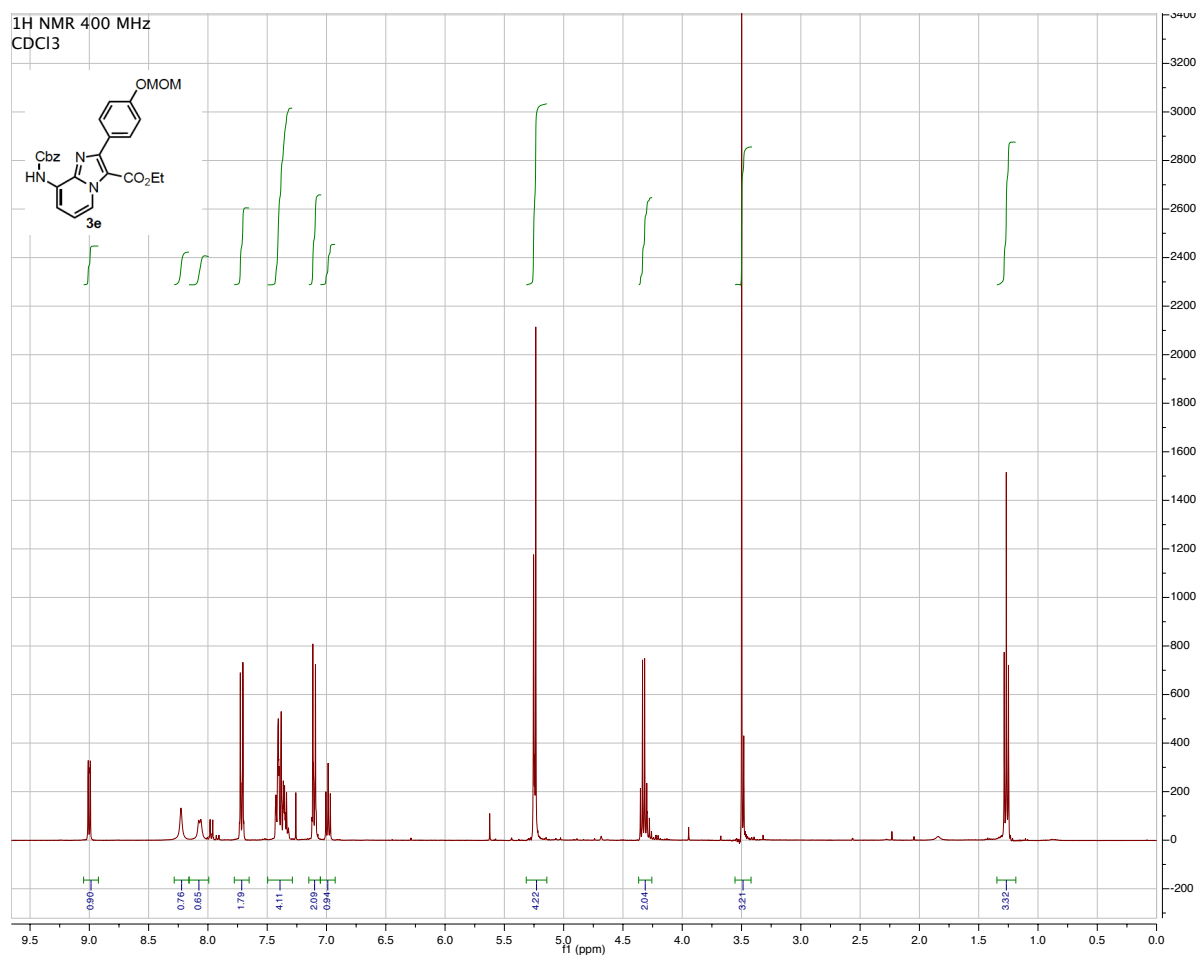

<sup>13</sup>C NMR 100 MHz  
CDCl<sub>3</sub>

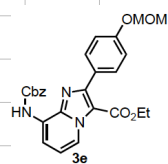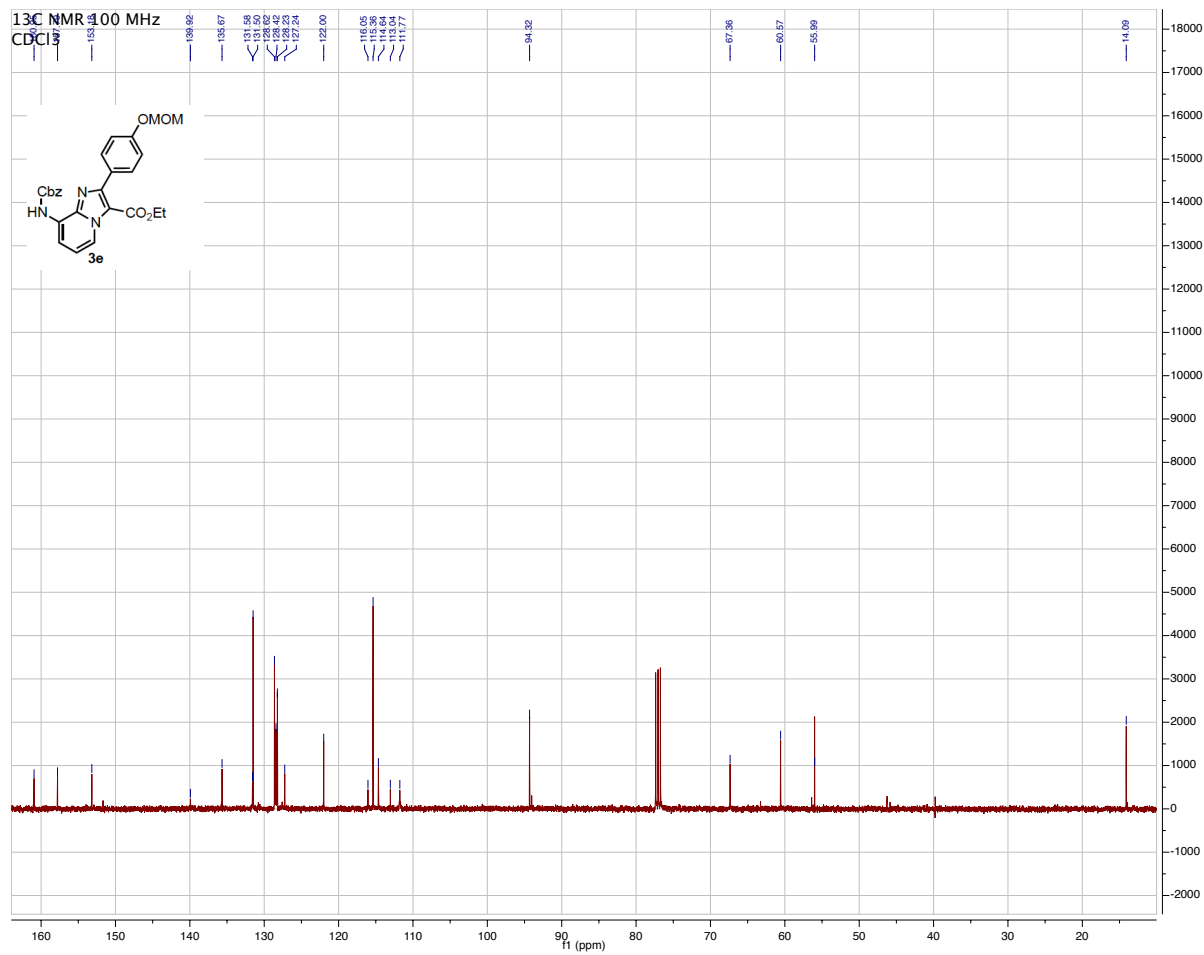

<sup>1</sup>H NMR 400 MHz  
CDCl<sub>3</sub>

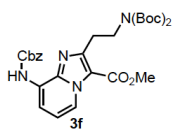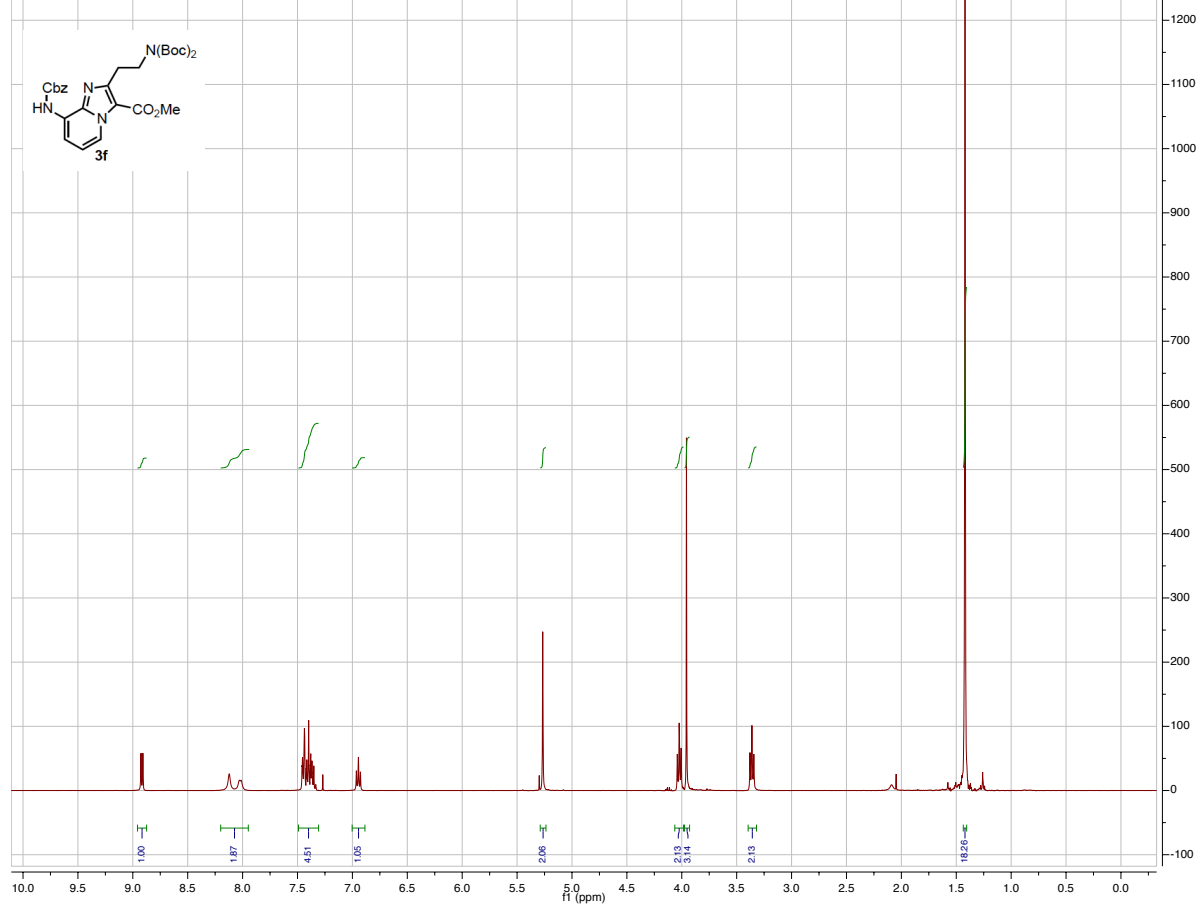

<sup>13</sup>C NMR 100 MHz  
CDCl<sub>3</sub>

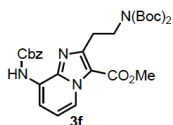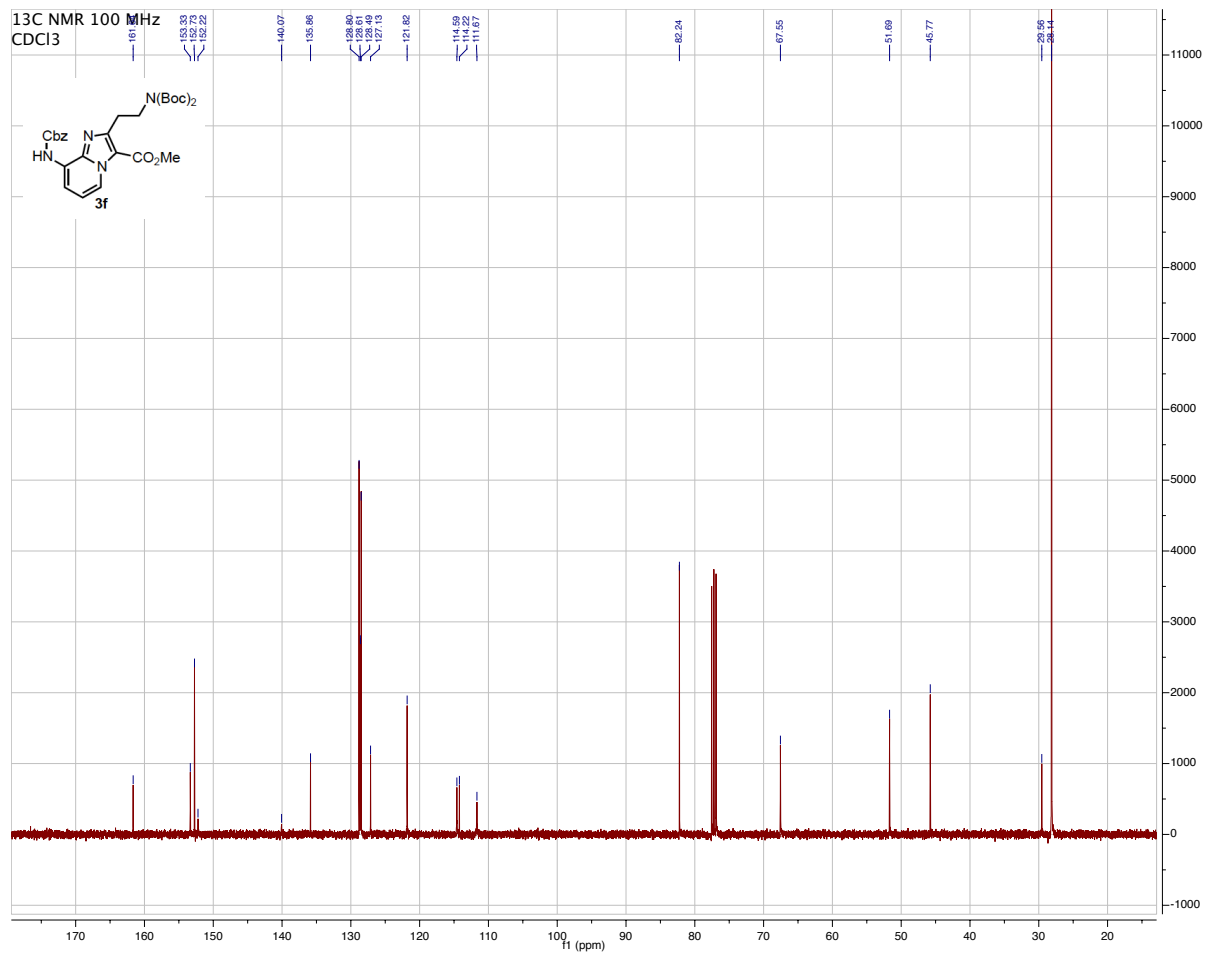

1H NMR 400 MHz  
CDCl3

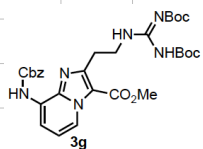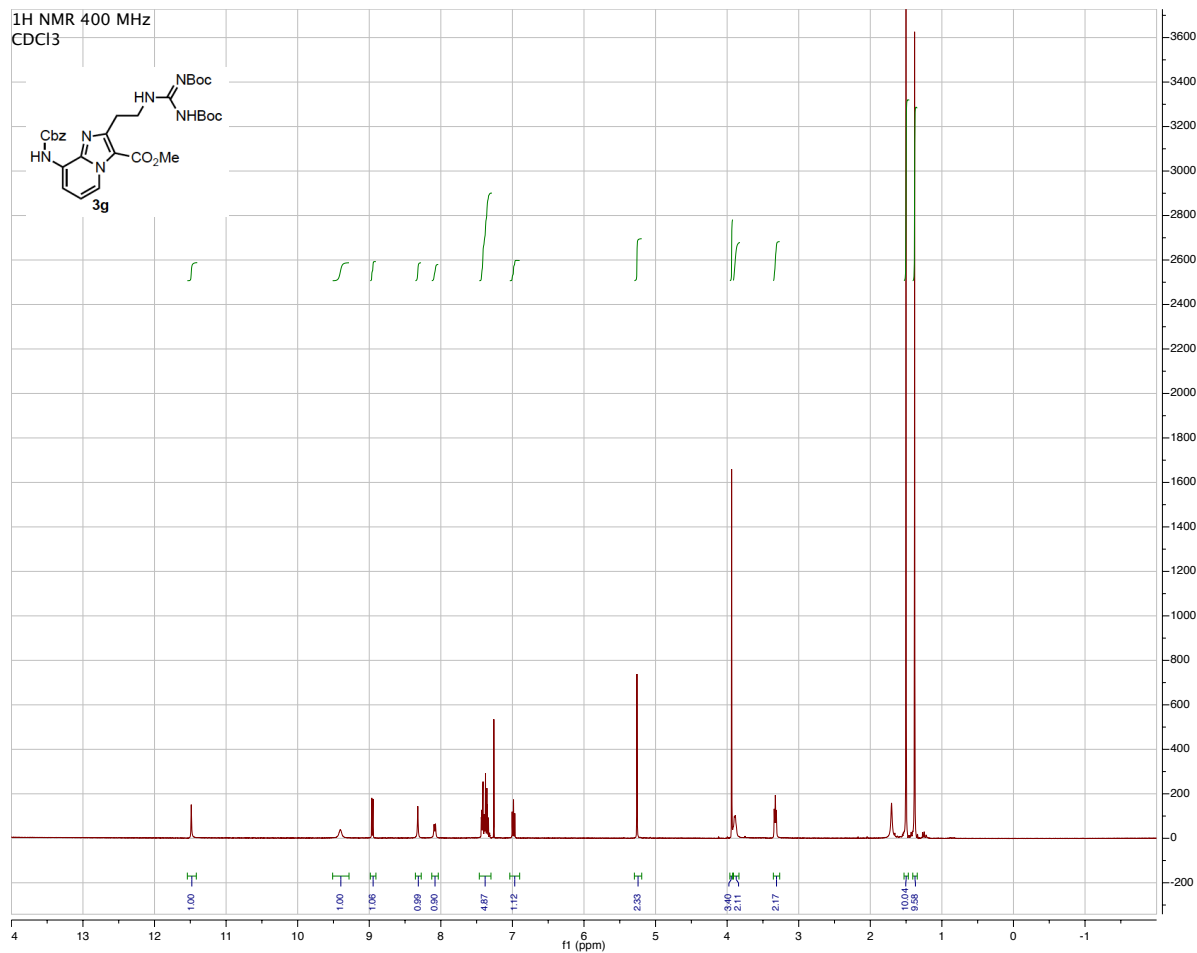

13C NMR 100 MHz  
CDCl3

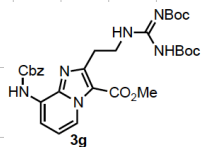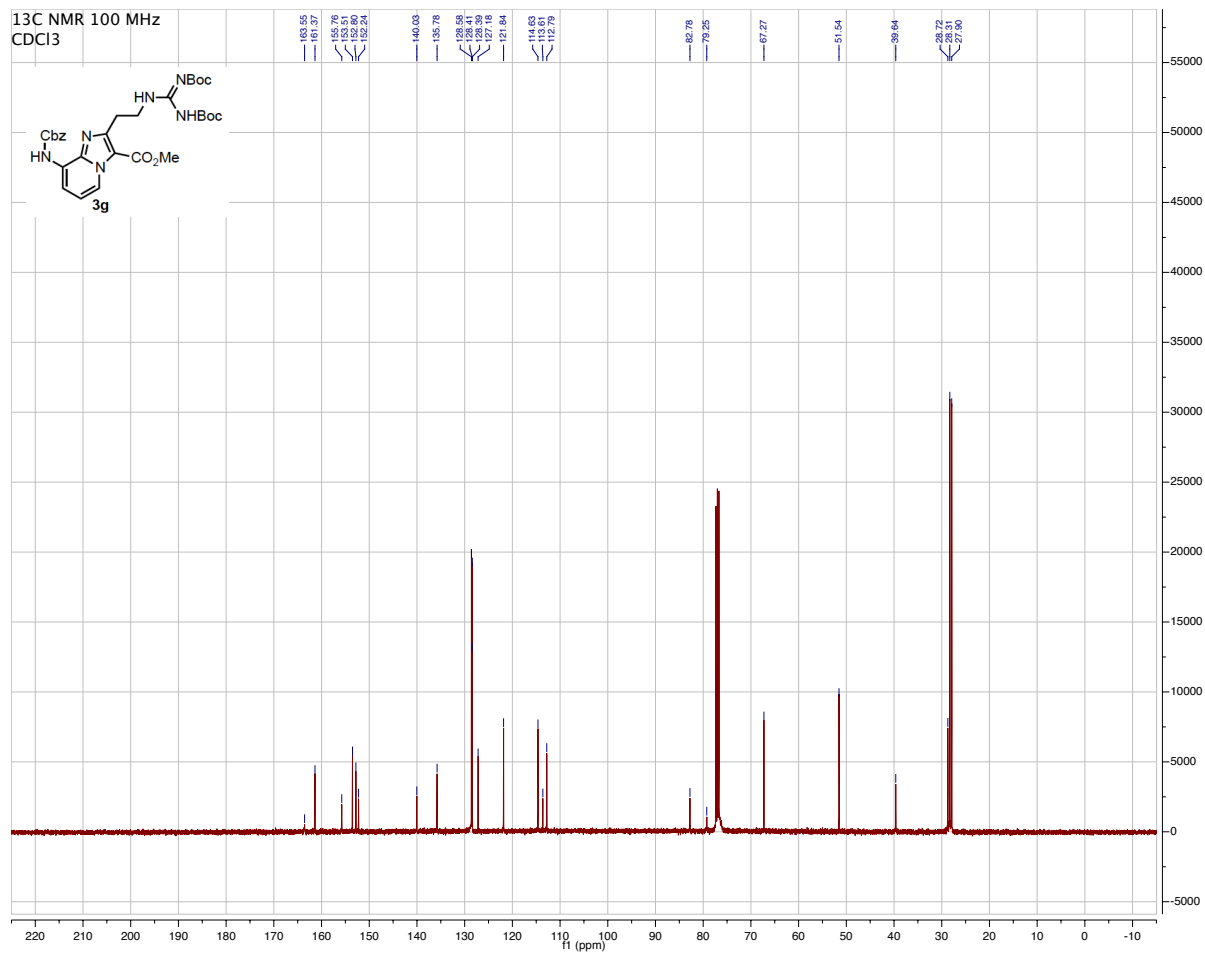

<sup>1</sup>H NMR 400 MHz  
CDCl<sub>3</sub>

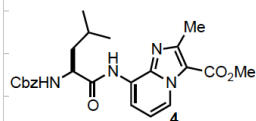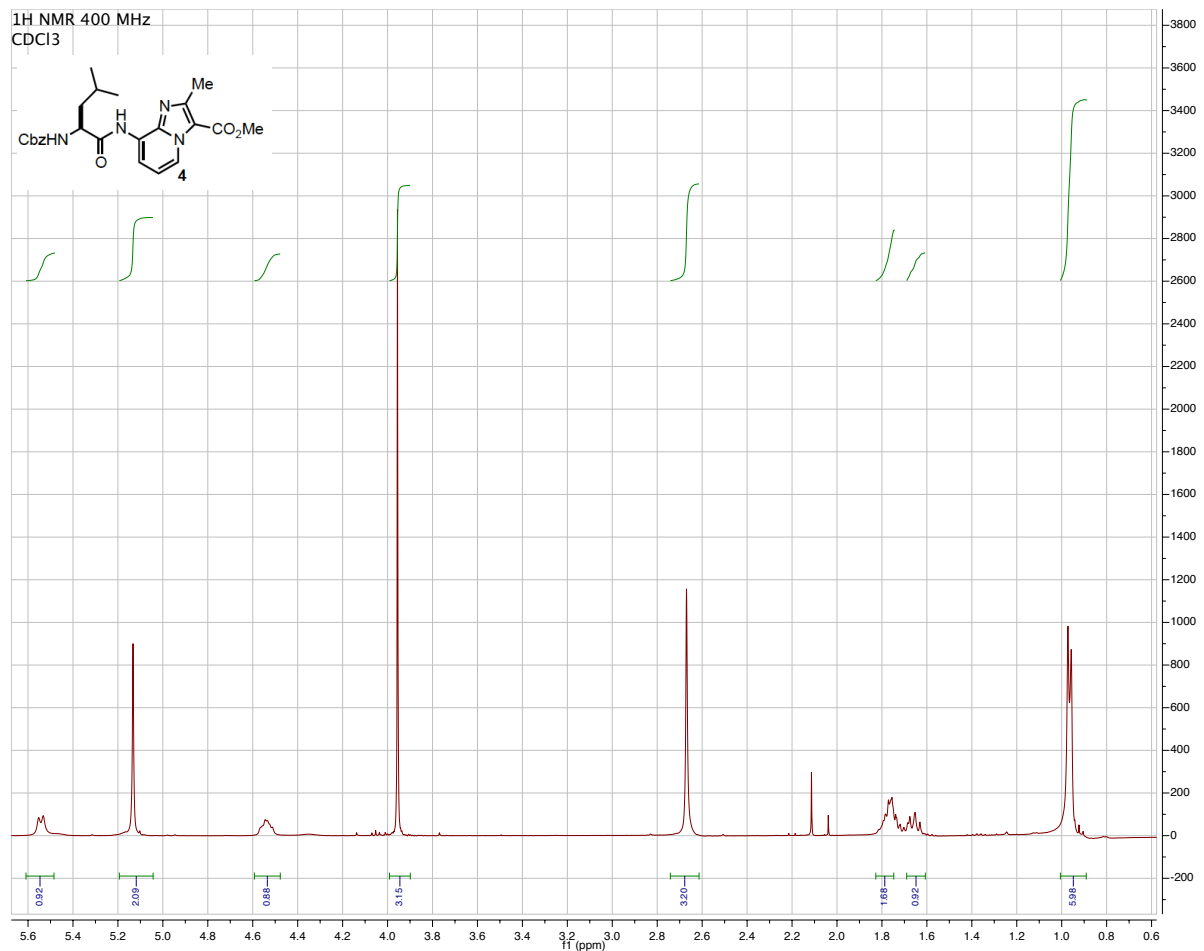

<sup>13</sup>C NMR 100 MHz  
CDCl<sub>3</sub>

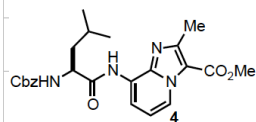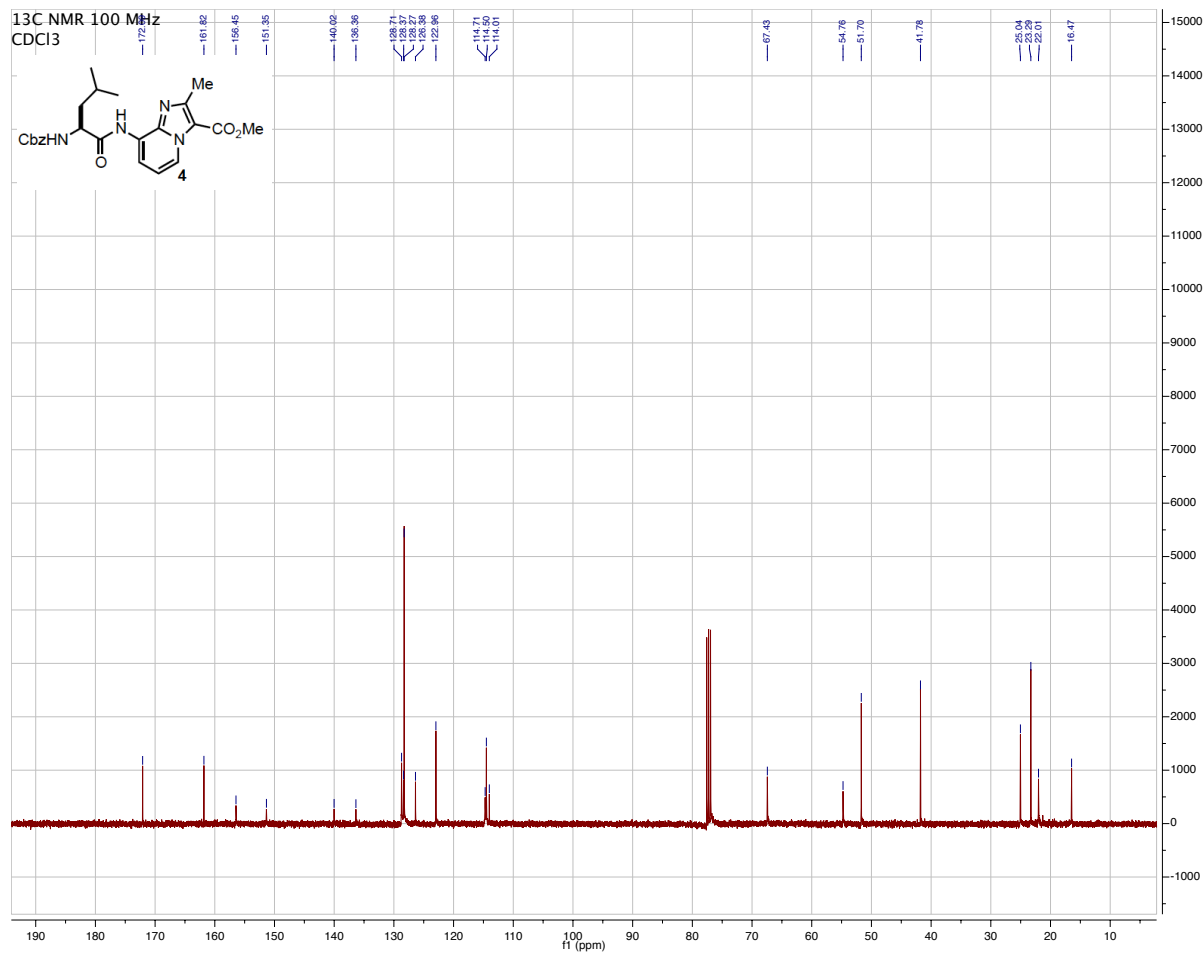

<sup>1</sup>H NMR 400 MHz  
CDCl<sub>3</sub>

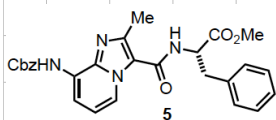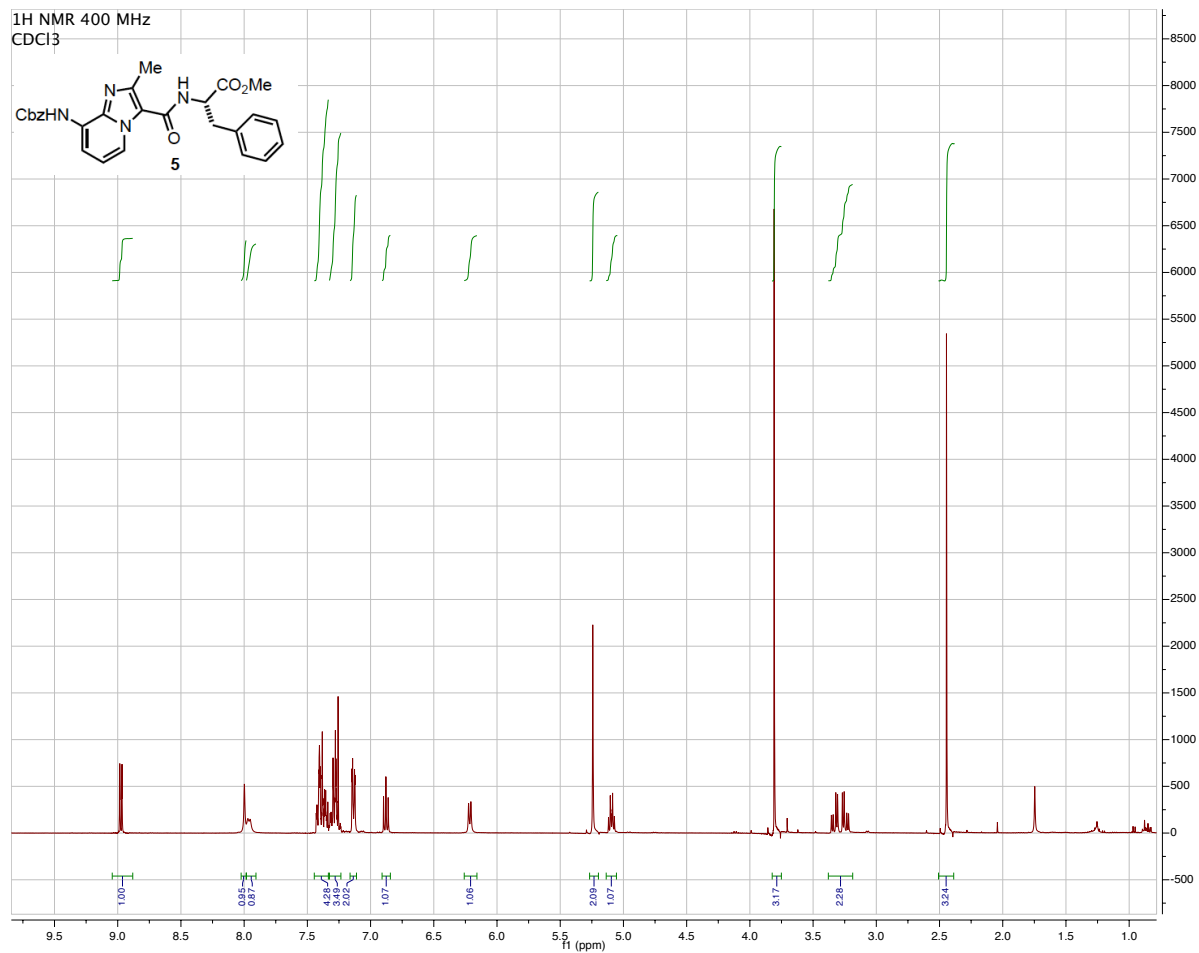

<sup>13</sup>C NMR 100 MHz  
CDCl<sub>3</sub>

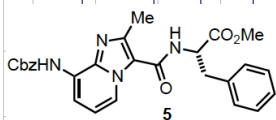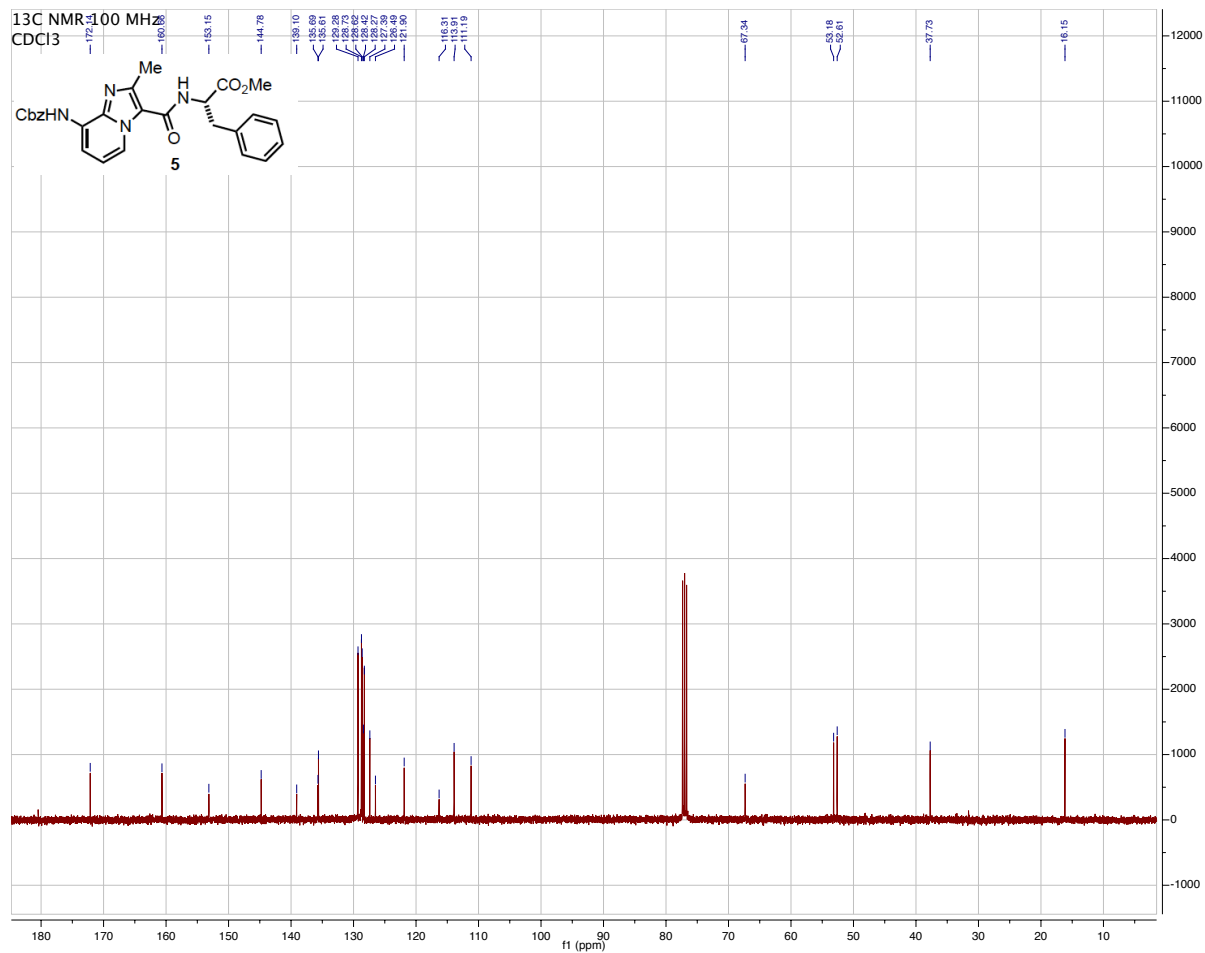

<sup>1</sup>H NMR 400 MHz  
CDCl<sub>3</sub>

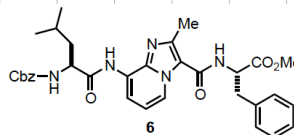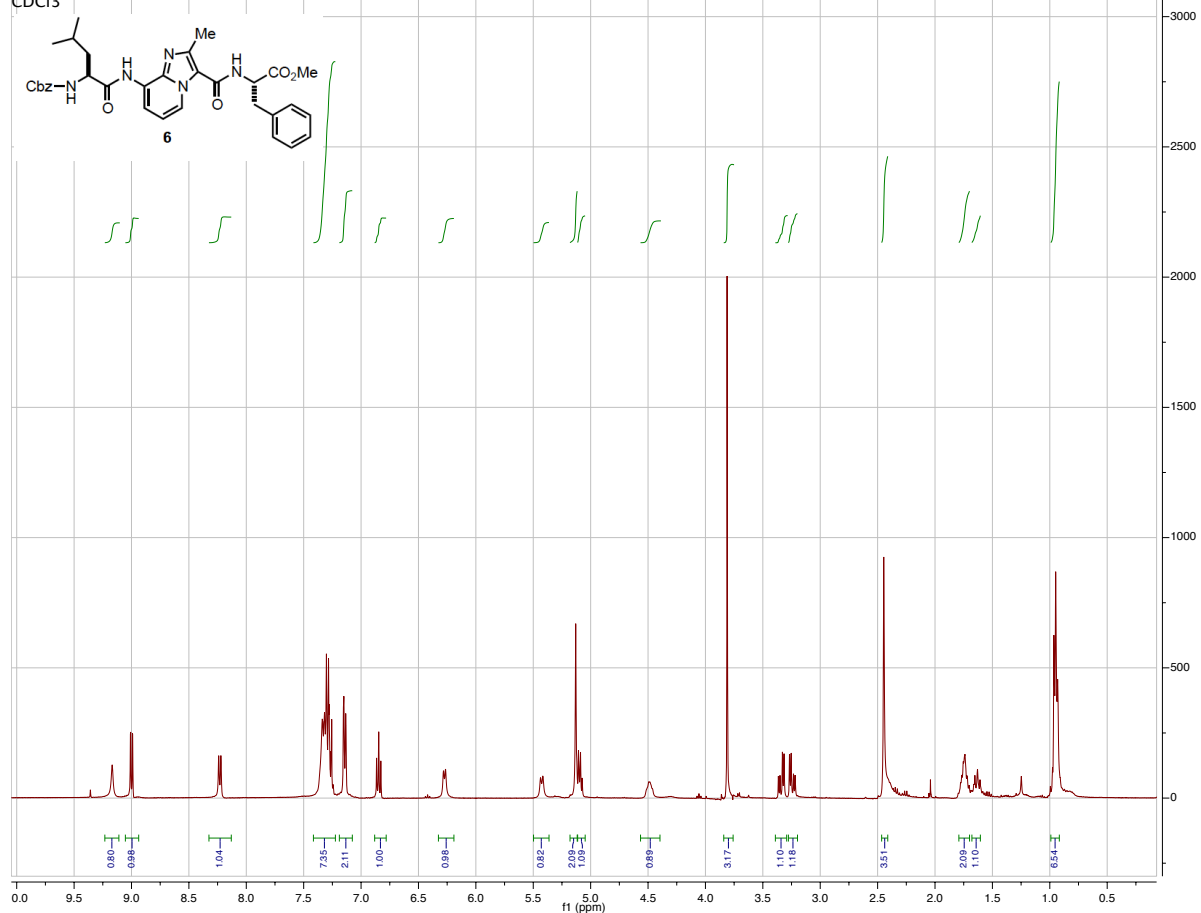

<sup>13</sup>C NMR 100 MHz  
CDCl<sub>3</sub>

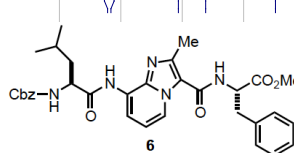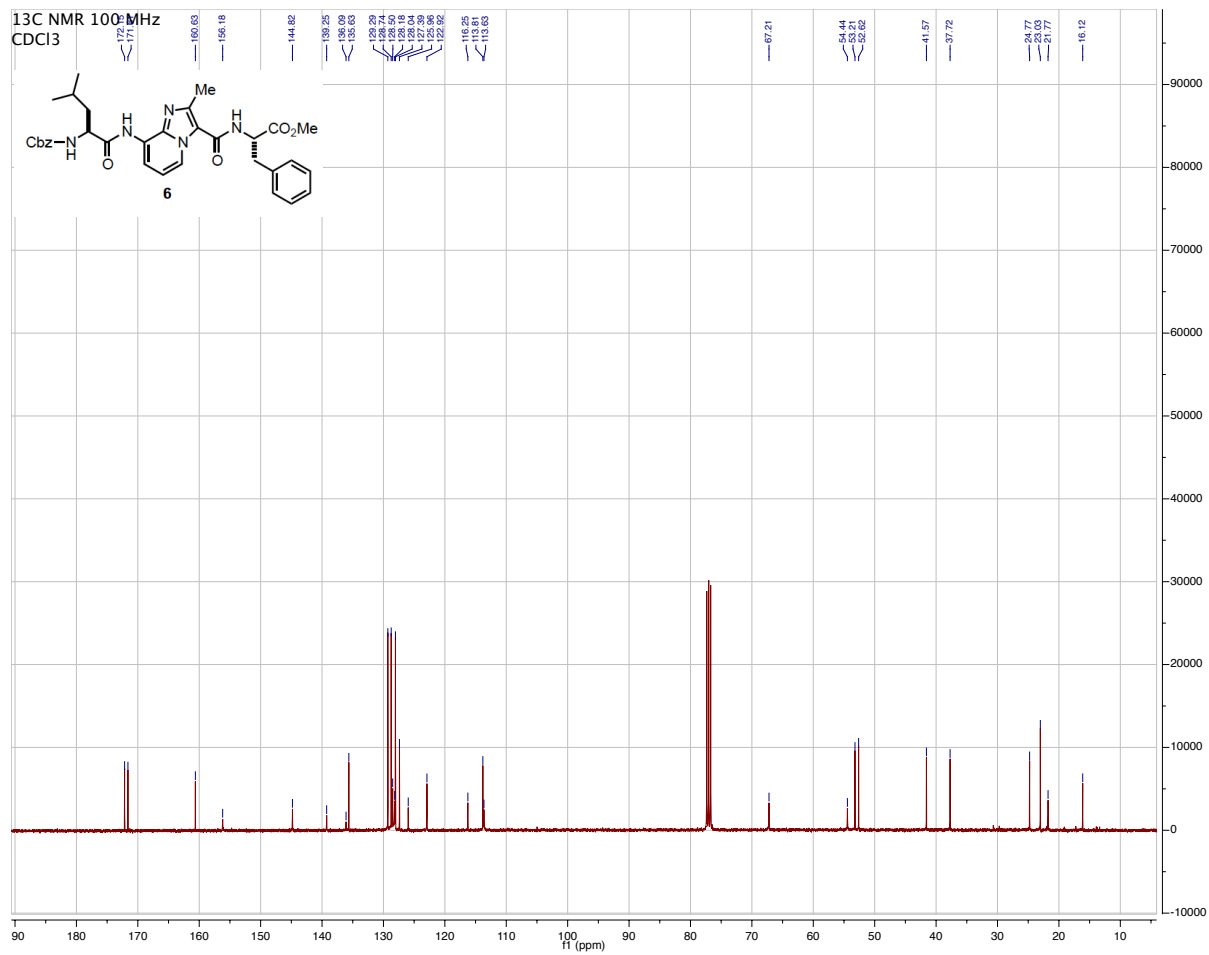







## 2D NMR SPECTRA

**General.** COSY spectra were recorded on an Agilent Technologies 400 MHz NMR at 298 K by collecting 2048 complex data points in the  $t_2$  domain by averaging 32 scans and 256 increments in the  $t_1$  domain. The original FIDs were zero-filled to give a final matrix of 1024 by 1024 real data points. A  $0^\circ$  sine-bell window function was applied in both dimensions. COSY data were obtained with 5 mM compound in  $\text{CDCl}_3$ .

ROESY spectra were recorded on an Agilent Technologies 500 MHz NMR at 298 K by collecting 4096 complex data points in the  $t_2$  domain by averaging 32 scans and 512 increments in the  $t_1$  domain with a mixing time of 300 ms. The original FIDs were zero-filled to give a final matrix of 2048 by 2084 real data points. A  $90^\circ$  sine-square window function was applied in both dimensions. ROESY data were obtained with 1 mM compound in  $\text{CDCl}_3$ . All the data were processed and analyzed using MestreNova 7.1 software.

COSY spectrum of compound 6 in CDCl<sub>3</sub> (400 MHz):

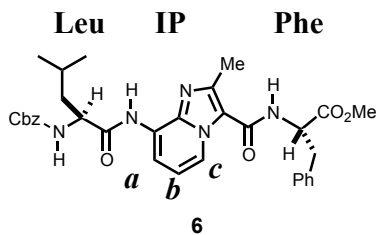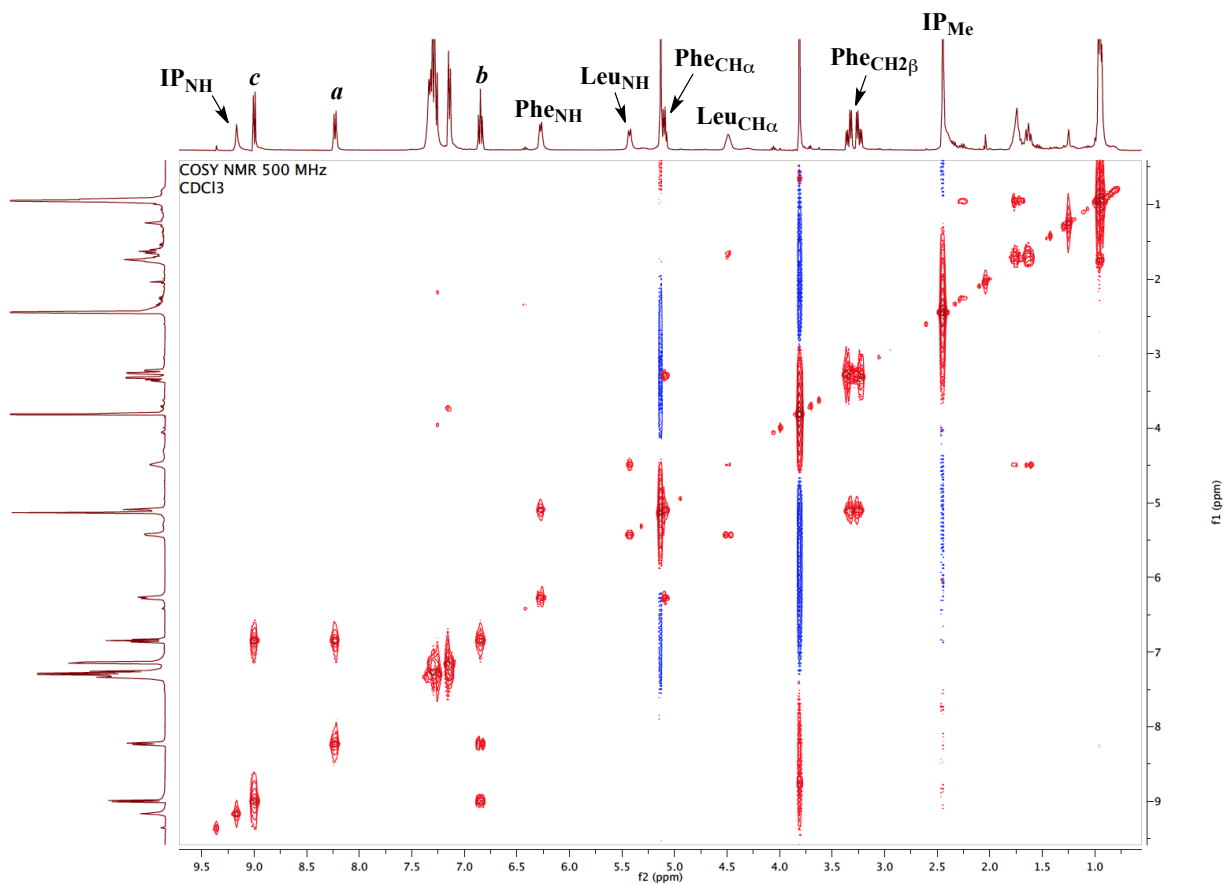

ROESY spectrum of compound 6 in CDCl<sub>3</sub> (500 MHz):

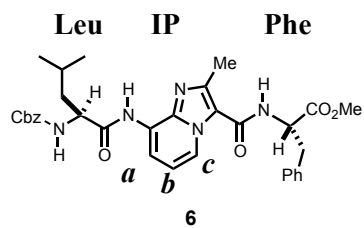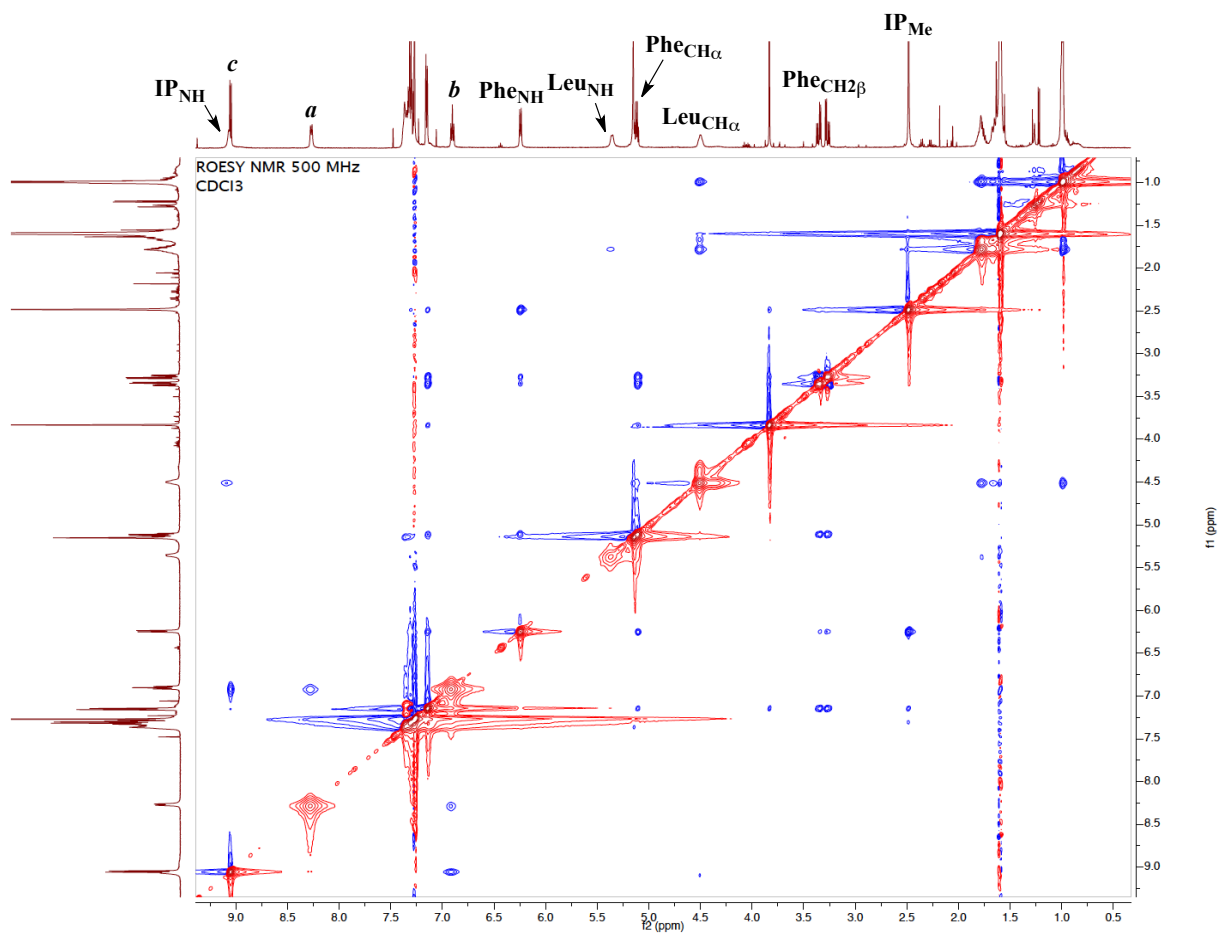

COSY spectrum of compound 8 in CDCl<sub>3</sub> (500 MHz):

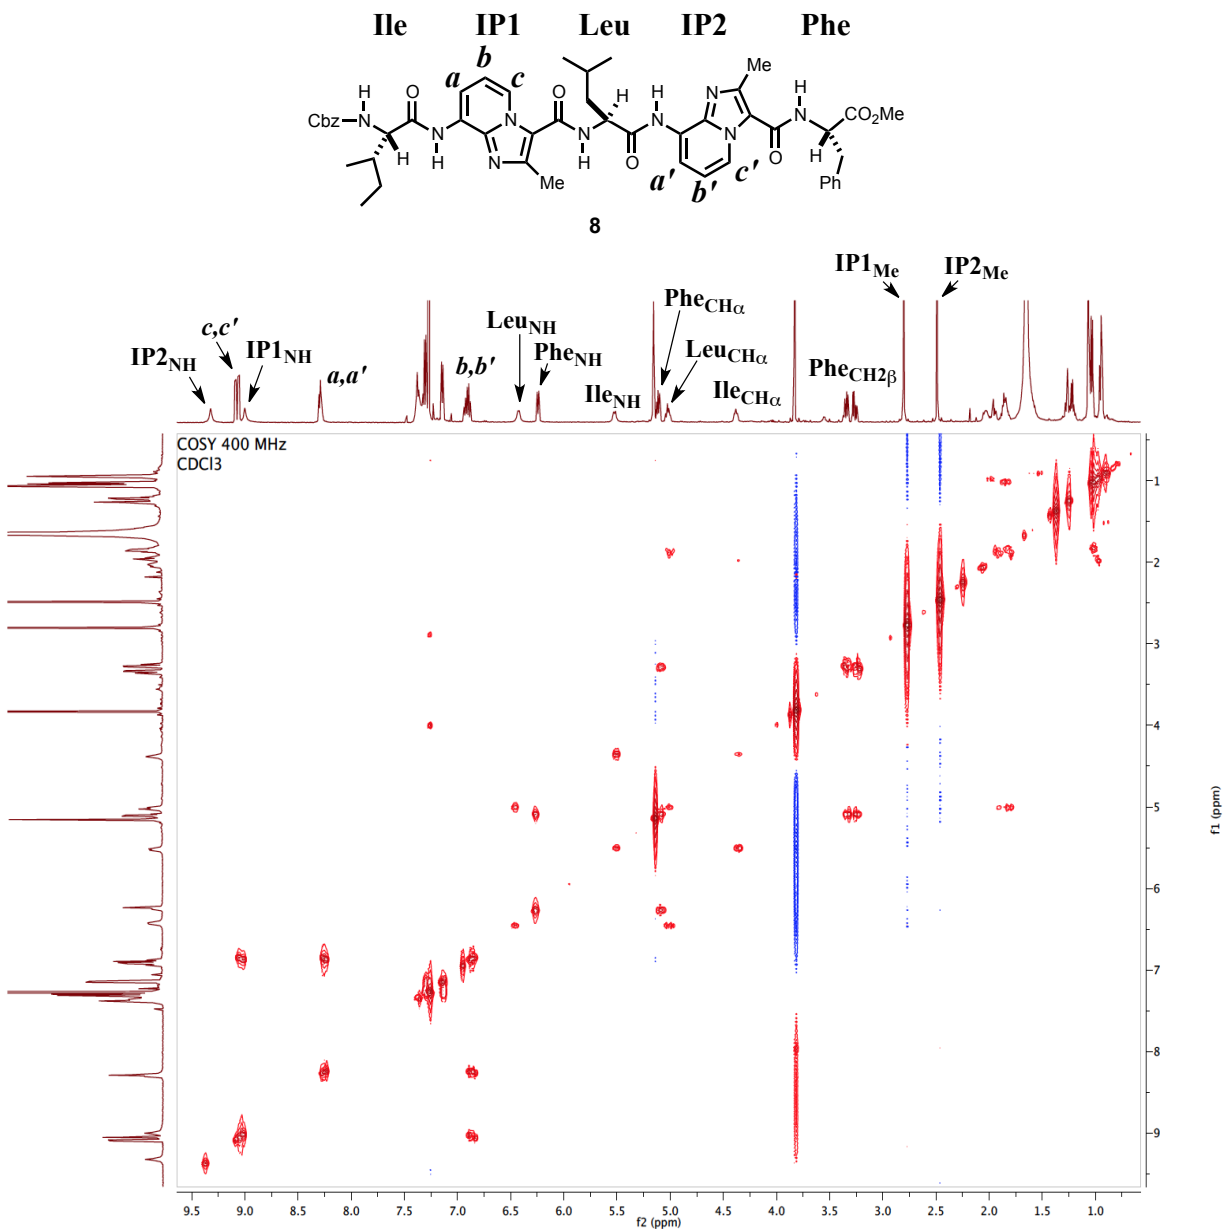

ROSEY spectrum of compound 8 in CDCl<sub>3</sub> (500 MHz):

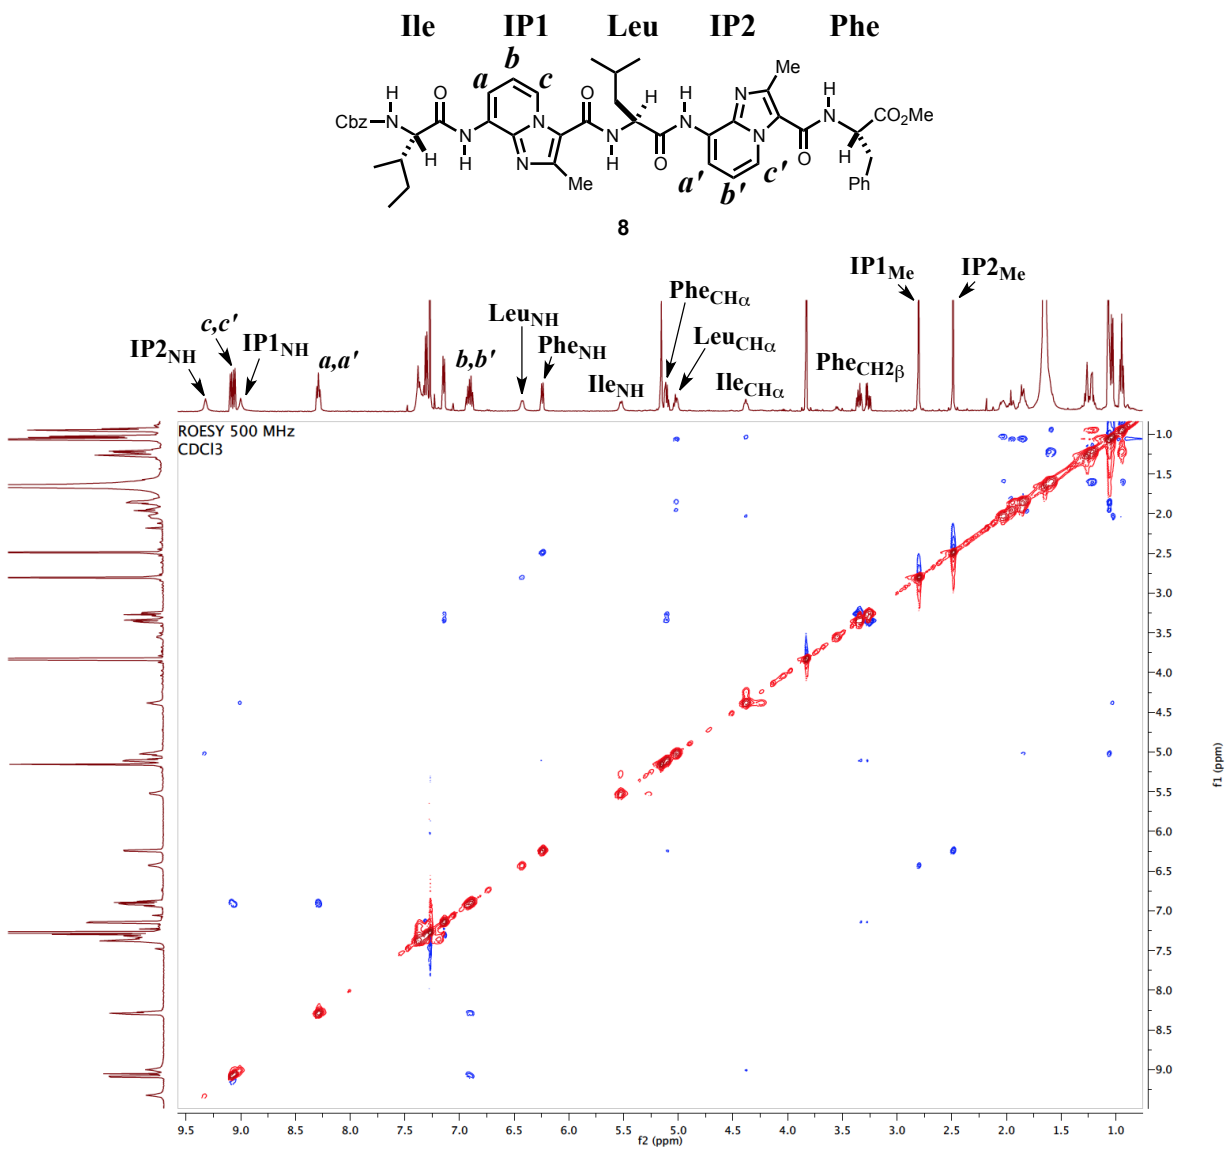

## $\delta\Delta/\delta T$ EXPERIMENTS

Variable temperature  $^1\text{H}$  NMR spectra at 400 MHz (in  $\text{DMSO-d}_6$ ):

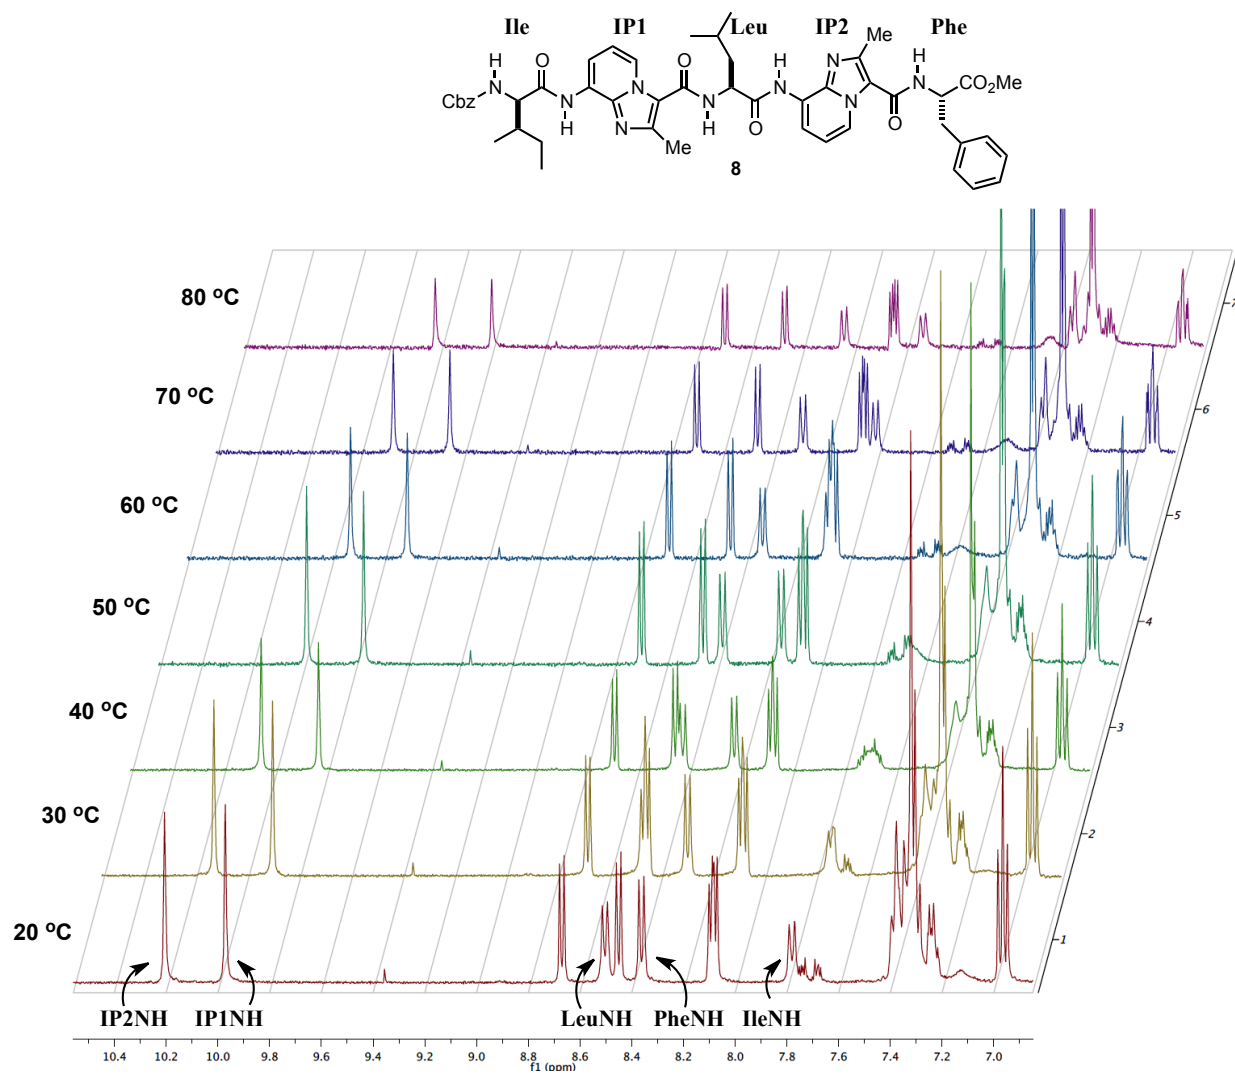

Tabular data for  $\delta\Delta/\delta T$  experiments:

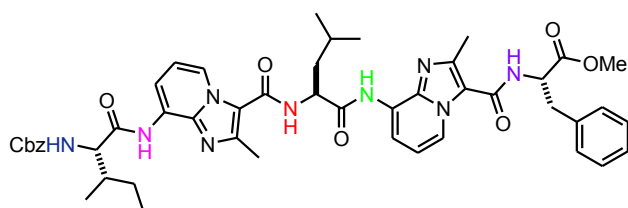

| Proton | $\delta$ (ppm) |        |        |       |       |       |       |
|--------|----------------|--------|--------|-------|-------|-------|-------|
|        | 20 °C          | 30 °C  | 40 °C  | 50 °C | 60 °C | 70 °C | 80 °C |
| IleNH  | 7.781          | 7.740  | 7.699  | 7.649 | 7.569 | 7.501 | 7.444 |
| IP1NH  | 9.972          | 9.899  | 9.831  | 9.768 | 9.709 | 9.654 | 9.603 |
| LeuNH  | 8.513          | 8.474  | 8.433  | 8.390 | 8.345 | 8.298 | 8.249 |
| IP2NH  | 10.206         | 10.126 | 10.054 | 9.988 | 9.928 | 9.873 | 9.821 |
| PheNH  | 8.372          | 8.304  | 8.234  | 8.162 | 8.090 | 8.018 | 7.943 |

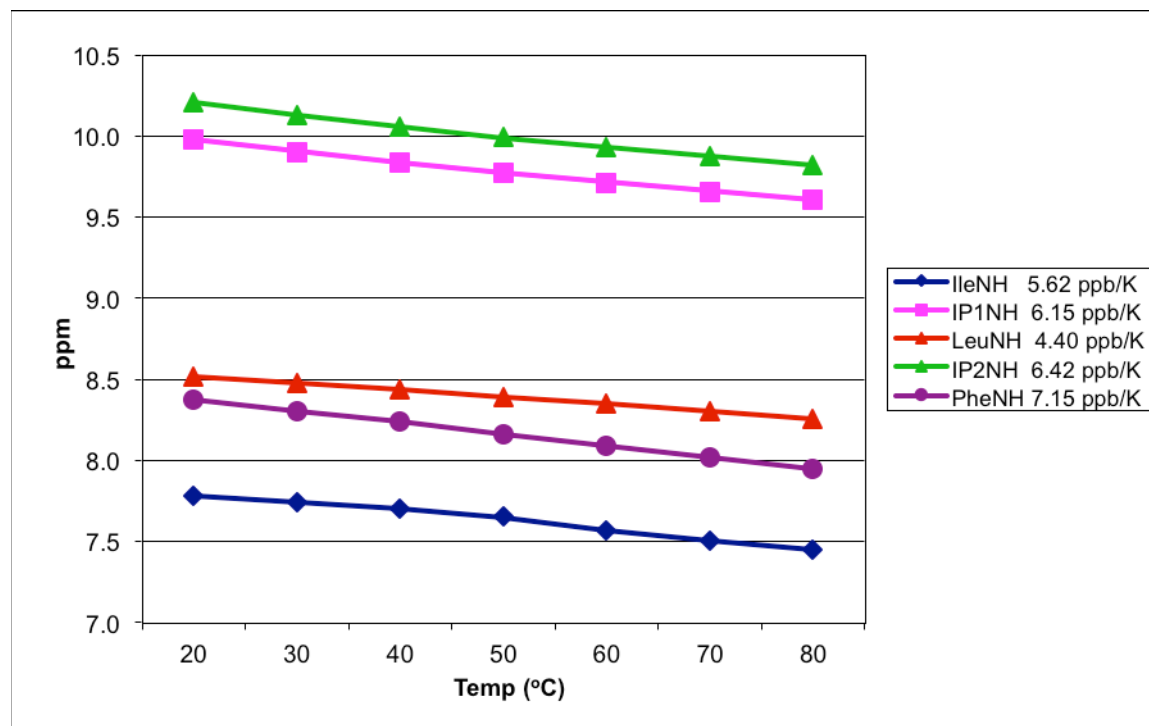



### Concentration Dependence of amide NH chemical shifts of ck-05-066 @ 20 °C

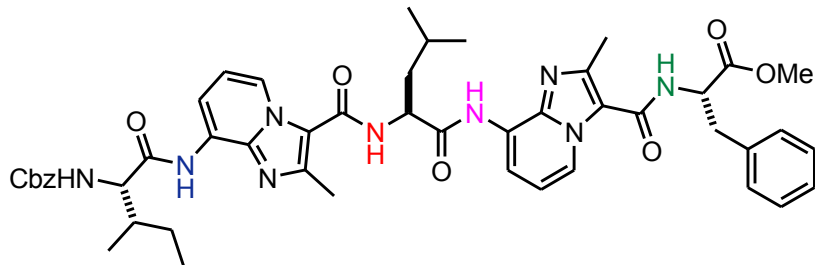

| Proton  | $\delta$ (ppm) @ concentration |         |         |         |         |         |         |          |          |
|---------|--------------------------------|---------|---------|---------|---------|---------|---------|----------|----------|
|         | 1.50 mM                        | 2.00 mM | 2.67 mM | 3.56 mM | 4.75 mM | 6.33 mM | 8.44 mM | 11.25 mM | 15.00 mM |
| IP 1 NH | -                              | 9.256   | 9.267   | 9.290   | 9.317   | 9.336   | 9.359   | 9.386    | 9.414    |
| IP 2 NH | -                              | -       | 8.969   | 8.990   | -       | -       | -       | 9.089    | 9.126    |
| Leu NH  | 6.385                          | 6.395   | 6.408   | 6.428   | 6.447   | 6.460   | 6.476   | 6.496    | 6.512    |
| Phe NH  | 6.244                          | 6.249   | 6.253   | 6.257   | 6.263   | 6.269   | 6.275   | 6.283    | 6.292    |

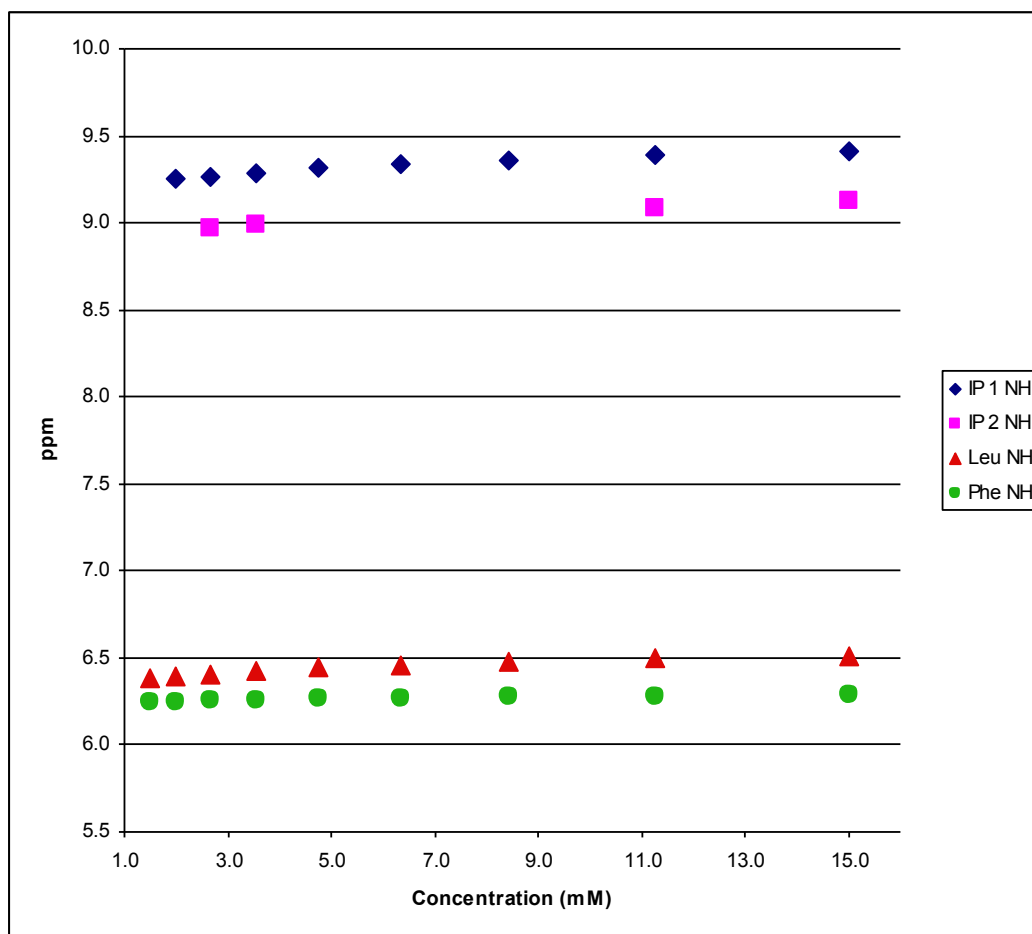

## Concentration Dependence of $\alpha$ -proton chemical shifts of ck-05-066 @ 20 °C

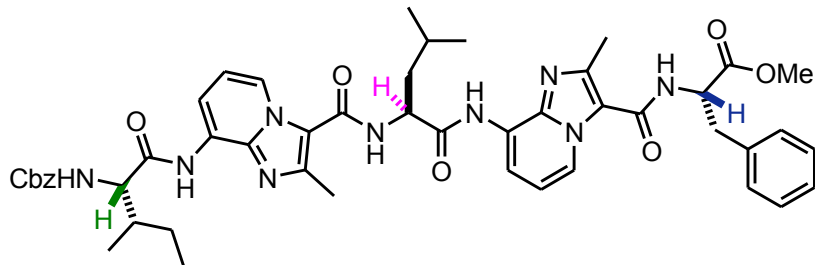

| Proton       | $\delta$ (ppm) @ concentration |         |         |         |         |         |         |          |          |
|--------------|--------------------------------|---------|---------|---------|---------|---------|---------|----------|----------|
|              | 1.50 mM                        | 2.00 mM | 2.67 mM | 3.56 mM | 4.75 mM | 6.33 mM | 8.44 mM | 11.25 mM | 15.00 mM |
| Phe $\alpha$ | 5.097                          | 5.099   | 5.100   | 5.101   | 5.101   | 5.102   | 5.101   | 5.101    | 5.100    |
| Leu $\alpha$ | 4.985                          | 4.988   | 4.990   | 4.994   | 4.997   | 4.998   | 4.999   | 5.001    | 5.002    |
| Ile $\alpha$ | 4.374                          | 4.375   | 4.372   | 4.369   | 4.368   | 4.367   | 4.363   | 4.362    | 4.360    |

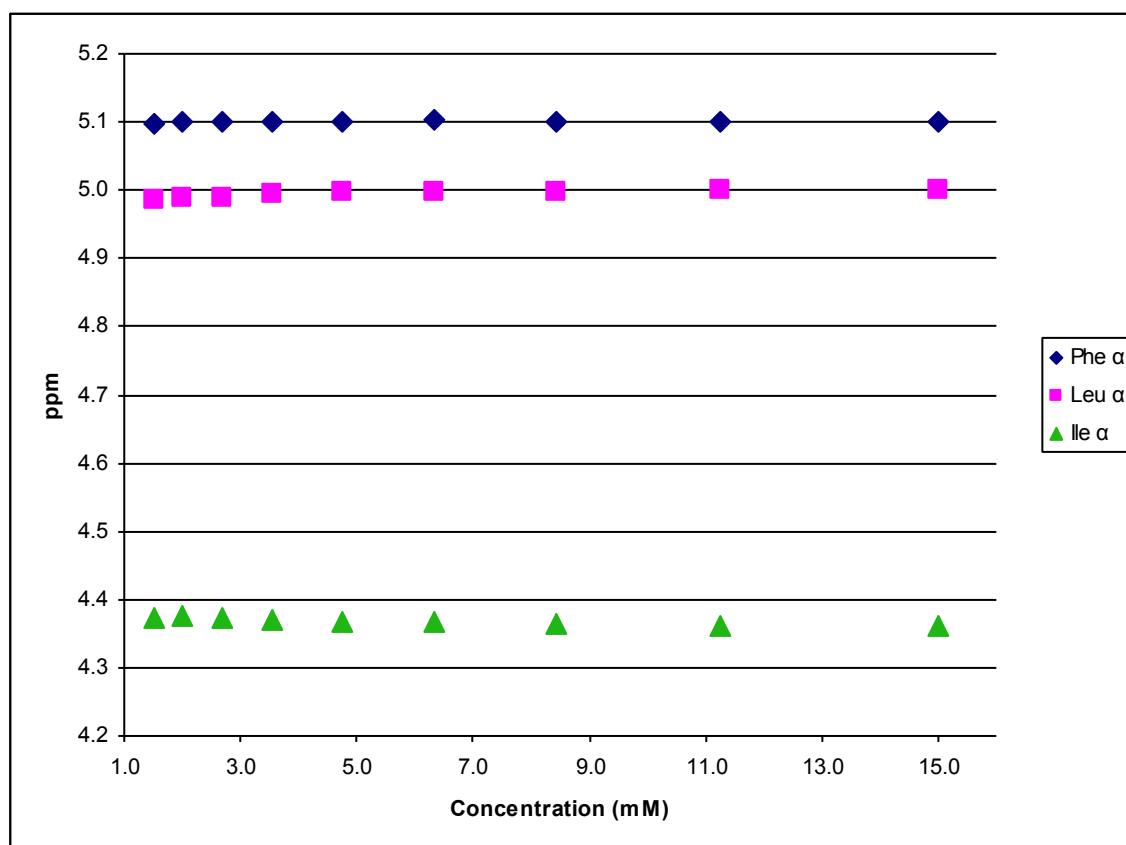

Supplement: NIHMS426728-supplement-1_si_001.pdf [file NIHMS426728-supplement-1_si_001.pdf]
